# Supplementary material for: OH incorporation and retention in eclogite-facies garnets from the Zermatt–Saas area (Switzerland) and their contribution to the deep water cycle
Source: Copernicus journal article supplement (doi:10.5194/ejm-35-679-2023), 2023-08-24
Supplement: Supplementary file 1 [file ejm-35-679-2023-supplement.zip]

Archive with 3 entries (3 files):
- SupplementaryMaterial.pdf
- ejm-35-679-2023-supplement-title-page.pdf
- ejm-2022-58-typeset_manuscript-version2_JR.pdf
