# Supplementary material for: OH incorporation and retention in eclogite-facies garnets from the Zermatt–Saas area (Switzerland) and their contribution to the deep water cycle
Source: Copernicus journal article supplement (doi:10.5194/ejm-35-679-2023), 2023-08-24
Supplement: Supplementary file 1 [file ejm-35-679-2023-supplement.zip › ejm-35-679-2023-supplement-title-page.pdf]

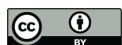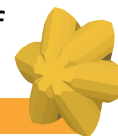

*Supplement of*

**OH incorporation and retention in eclogite-facies garnets from the Zermatt–Saas area (Switzerland) and their contribution to the deep water cycle**

**Julien Reynes et al.**

*Correspondence to:* Julien Reynes ([julien.reynes@unil.ch](mailto:julien.reynes@unil.ch))

- [ejm-35-679-2023-supplement-title-page.pdf](#)
- [SupplementaryMaterial.pdf](#)
- [ejm-2022-58-typeset\\_manuscript-version2\\_JR.pdf](#)

The copyright of individual parts of the supplement might differ from the article licence.
