# Supplementary material for: OH incorporation and retention in eclogite-facies garnets from the Zermatt–Saas area (Switzerland) and their contribution to the deep water cycle
Source: Copernicus journal article supplement (doi:10.5194/ejm-35-679-2023), 2023-08-24
Supplement: Supplementary file 1 [file ejm-35-679-2023-supplement.zip › ejm-2022-58-typeset_manuscript-version2_JR.pdf]

# OH incorporation and retention in eclogite-facies garnets from the Zermatt-Saas<sup>CE1</sup> area (Switzerland) and their contribution to the deep water cycle

Julien Reynes<sup>1,2</sup>, Jörg Hermann<sup>2</sup>, Pierre Lanari<sup>2</sup>, and Thomas Bovay<sup>1,2</sup>

<sup>1</sup>Institute of Earth Sciences, University of Lausanne, UNIL-Mouline<sup>CE2</sup>,  
Géopolis building, 1015 Lausanne, Switzerland

<sup>2</sup>Institute of Geological Sciences, University of Bern, Baltzerstrasse 3, 3012 Bern, Switzerland

**Correspondence:** Julien Reynes (julien.reynes@unil.ch)

Received: 10 November 2022 – Revised: 14 July 2023 – Accepted: 15 July 2023 – Published:

**Abstract.** <sup>TS1</sup><sup>CE3</sup> The incorporation mechanisms of OH groups in garnet were investigated in a suite of high-pressure rocks from the Zermatt-Saas area (Switzerland) using a combination of Fourier transform infrared spectroscopy (FTIR) and electron probe micro-analysis (EPMA). Investigated garnet specimens include grossular-andradite-uvarovite solid solutions in serpentinite and rodingite and almandine-grossular-pyrope-spessartine solid solutions in eclogite, mafic fels<sup>CE4</sup> and meta-sediment. All rocks experienced the same peak metamorphic conditions corresponding to a burial depth of  $\sim 80$  km ( $\sim 540^\circ\text{C}$ , 2.3 GPa), allowing determination of the OH content in garnet as a function of rock type. The capacity for OH incorporation into garnet strongly depends on its composition. Andradite-rich ( $400\text{--}5000\ \mu\text{g g}^{-1}\ \text{H}_2\text{O}$ ) and grossular-rich garnet ( $200\text{--}1800\ \mu\text{g g}^{-1}\ \text{H}_2\text{O}$ ) contain at least 1 order of magnitude more  $\text{H}_2\text{O}$  than almandine-rich garnet ( $< 120\ \mu\text{g g}^{-1}\ \text{H}_2\text{O}$ ). Microscale analyses using FTIR and EPMA profiles and maps reveal the preservation of OH zoning throughout the metamorphic history of the samples. The OH content correlates strongly with Mn, Ca and Ti zoning and produces distinct absorption bands that are characteristic of multiple nano-scale OH environments. The use of 2D diffusion modelling suggests that H diffusion rates in these rocks is as low as  $\log(D[\text{m}^2\ \text{s}^{-1}]) = -24.5$  at  $540^\circ\text{C}$ . Data were collected for the main garnet-bearing rock types of the Zermatt-Saas area allowing a mass balance model of  $\text{H}_2\text{O}$  to be calculated. The result shows that  $\sim 3360\ \text{kg H}_2\text{O km}^{-1}$  <sup>TS2</sup> (section of oceanic crust)  $\text{yr}^{-1}$  could be transported by garnet in the subducting slab beyond 80 km depth and contributed to the deep-Earth water cycle during the Eocene subduction of the Piemonte–Liguria Ocean.

## 1 Introduction

The global water budget involves exchanges between three main reservoirs: the atmosphere, the Earth's surface and the Earth's interior. Exchange between the first two reservoirs can be evaluated because they occur on short timescales of days to years (Freeze and Cherry, 1979; Nace, 1971). In contrast, the transfer of water between the surface and the deep Earth occurs on longer timescales (from several Myr to Gyr<sup>CE5</sup>) and is more challenging to quantify (Rüpke et al., 2004). Today, subduction zones play a critical role in the deep water cycle as the subducted rocks can carry a significant amount of  $\text{H}_2\text{O}$  to mantle depths (Katayama et al.,

2006). Water is first stored in hydrous minerals formed during hydrothermal alteration at the ocean floor and is progressively released at depth by metamorphic reactions involving the destabilisation of OH-bearing minerals and the formation of nominally anhydrous minerals (Schmidt and Poli, 1998). Although the main part of the released water escapes the subducting slab and returns to the surface via hydrothermal vents or arc magmatism, the remaining  $\text{H}_2\text{O}$  stored in nominally anhydrous minerals can be carried to greater depth, eventually reaching the mantle transition zone (Peacock, 1990). The estimation of the storage capacity of the subducting oceanic crust is fundamental to quantify the potential effects of subduction on the global water cycle budget of our planet.

Garnet is a key mineral for this purpose as this nominally anhydrous metamorphic mineral forms from depths of  $\sim 30$  km in the subducting oceanic crust (Schmidt and Poli, 1998) and can incorporate water in the form of OH groups where H substitutes for cations in its crystal structure (Cohen-Addad et al., 1967). Garnet displays a wide range of solid solutions and can form in a large variety of rocks. The main endmembers belong to two families: the pyrospite family with almandine ( $\text{Fe}^{2+} / \text{Al}^{3+}$ ), pyrope ( $\text{Mg}^{2+} / \text{Al}^{3+}$ ) and spessartine ( $\text{Mn}^{2+} / \text{Al}^{3+}$ ) endmembers, and the ugrandite family with uvarovite ( $\text{Ca}^{2+} / \text{Cr}^{3+}$ ), grossular ( $\text{Ca}^{2+} / \text{Al}^{3+}$ ) and andradite ( $\text{Ca}^{2+} / \text{Fe}^{3+}$ ). It has been previously demonstrated that endmembers of the ugrandite family have an enhanced ability to incorporate OH groups, up to several weight percent  $\text{H}_2\text{O}$  (Rossman and Aines, 1991; Amthauer and Rossman, 1998; Armbruster et al., 1998), whereas the pyrospite family, especially pyrope-**CE6** and almandine-rich garnet, are limited to a couple hundred micrograms per gram of  $\text{H}_2\text{O}$  (Aines and Rossman, 201984; Bell et al., 1995; Maldener et al., 2003).

The main point defect enabling H to be incorporated in the garnet structure is the silicon vacancy or hydrogarnet substitution with  $\text{Si}^{4+}$  replaced by  $4\text{H}^+$  (Cohen-Addad et al., 1967; Foreman, 1968; Lager et al., 1987). However, the large variety of infrared OH bands observed for such garnets (up to 10 for a single spectrum; e.g. Aines and Rossman, 1984; Rossman and Aines, 1991) and the different behaviour of the OH bands regarding hydrogen diffusion processes (Blanchard and Ingrin, 2004b; Kurka, 2005; Kurka et al., 2005; Reynes et al., 2018) indicate that multiple configurations are present. Several point defects were proposed, such as  $\text{H}^+$  taking place in other sites (octahedral–dodecahedral) (Andr  t et al., 2002; Basso et al., 1984; Geiger et al., 1991), coupled substitutions such as H–B and H–Li-**CE7** (Lu and Keppler, 1997), or incomplete silicon vacancy coupled with  $\text{Fe}^{2+} / \text{Fe}^{3+}$  or  $\text{Ti}^{4+}$  (Khomenko et al., 1994; K  hberger et al., 1989; Reynes et al., 2020). A second emerging theory is the interpretation of different infrared OH bands as different degrees of interconnection between hydrogarnet substitutions (Geiger and Rossman, 2020a, b). High-wavenumber bands are allocated to OH groups situated in clustered hydrogarnet substitutions, whereas low-wavenumber bands are interpreted as isolated hydrogarnet substitutions. An alternative interpretation is that the high-wavenumber bands are related to coupled F–H exchanges (Mosenfelder et al., 2022). Identifying different OH defects is essential for the determination of the H retentivity over long timescales.

Previous studies in various locations have shown that high-pressure garnet formed in subduction zones can incorporate significant amounts of OH. Eclogitic garnets from the Kockchetav massif display  $10\text{--}50 \mu\text{g g}^{-1}\text{H}_2\text{O}$  for quartz-bearing eclogites,  $80\text{--}120 \mu\text{g g}^{-1}\text{H}_2\text{O}$  for coesite-bearing eclogites and  $130\text{--}150 \mu\text{g g}^{-1}\text{H}_2\text{O}$  for diamond-grade eclogite (Katayama et al., 2006). Much higher  $\text{H}_2\text{O}$  contents of  $14\text{--}1900 \mu\text{g g}^{-1}\text{H}_2\text{O}$  are reported in eclogitic garnet spec-

imens from Dabie-Sulu (Chen et al., 2007; Sheng et al., 2007; Xia et al., 2005). Ultra-high-pressure (UHP) rocks from the Erzgebirge show  $43\text{--}84 \mu\text{g g}^{-1}\text{H}_2\text{O}$  in eclogitic garnet and  $121\text{--}241 \mu\text{g g}^{-1}\text{H}_2\text{O}$  in garnetite (metaroddingite) (Schm  dicke and Gose, 2017, 2020; Gose and Schm  dicke, 2018). The most  $\text{H}_2\text{O}$ -depleted high-pressure garnet specimens were also reported by these authors from the Lepontine Alps (Cima di Gagnone, CG, and Alpe Arami, AA), with  $4\text{--}11 \mu\text{g g}^{-1}\text{H}_2\text{O}$  in eclogite (AA) and  $23\text{--}46 \mu\text{g g}^{-1}\text{H}_2\text{O}$  in garnetite (CG). In absence of transects from core to rim or  $\text{H}_2\text{O}$  distribution maps, it is challenging to establish whether these  $\text{H}_2\text{O}$  contents reflect the amount of water incorporated during garnet crystallisation under high-pressure conditions or whether they were modified by diffusion during cooling and exhumation.

This study focuses on the quantification of  $\text{H}_2\text{O}$  in garnet and its spatial distribution at the atomic scale (IR-band positions, relationship with chemistry, potential point defects) to the microscale (garnet zoning at the grain scale, correlation with growth stages) and even to the kilometre scale (garnet OH budget in garnet of the subducted oceanic crust). A total of 15 different garnet samples covering the most prominent solid solutions from a full suite of high-pressure rocks were studied by Fourier transform infrared spectroscopy (FTIR) for  $\text{H}_2\text{O}$  determination and electron probe micro-analysis (EPMA) for chemical composition (using transects and maps). The samples come from a subducted portion of oceanic crust and the associated **Theodule** Glacier unit (TGU) that are part of the Zermatt-Saas zone (ZS) located in the Western Alps (Switzerland). The large diversity of rock types and garnet compositions makes this area an excellent locality to investigate the H incorporation mechanisms in garnet as well as the  $\text{H}_2\text{O}$  budget in subducted oceanic crust. A major aspect to consider when dealing with high-pressure rocks present at the Earth’s surface is whether the features observed were acquired during the burial stage (high pressure) or were partially or completely reset during later exhumation. This leads to the three main questions that are addressed in this paper. (1) How much water can be stored by garnet in deeply subducted oceanic crust? (2) What types of OH defects are present in the different garnet types? (3) Are the original OH contents affected by diffusion after garnet growth?

## 2 Geological setting and samples

Samples were collected in the ZS and TGU tectonic units during fieldwork in the Zermatt-Saas area or were obtained from the collection of samples from Zermatt of the Natural History Museum of Bern (Naturhistorisches Museum Bern).

The Zermatt-Saas zone is a fragment of the oceanic lithosphere that was part of the Piemonte–Liguria Ocean (Bea  rth, 1967) formed in the Jurassic, approximately 164 Myr ago (Allalin gabbro; Rubatto et al., 1998). This fragment was

subducted below the Apulian margin around 40–50 Myr ago (Bowtell et al., 1994; Rubatto et al., 1998) and reached eclogite-facies conditions at a depth of around 80 km. Peak conditions are estimated to be at least 540 °C and 2.3 GPa (550–600 °C, 2.5–3.0 GPa; Bucher et al., 2005; 540 ± 20 °C and 2.3 ± 0.1 GPa; Angiboust et al., 2009), though some studies of the Zermatt-Saas zone give higher conditions (600 ± 20 °C and 2.5 ± 0.3 GPa; Rebay et al., 2018; 600–670 °C and 2.8–3.5 GPa; Luoni et al., 2018). It was eventually rapidly exhumed in the period of 40–35 Ma (Agard et al., 2002; Amato et al., 1999). The area is composed of a diversity of rock types: serpentinites and associated rodingites (Li et al., 2004); metagabbros (Chinner and Dixon, 1973); metabasalts and hydrothermally altered mafic rocks (Martin et al., 2008); and locally Jurassic to early Cretaceous mafic, pelitic, carbonate-rich and Mn-rich metasediments (Lemoine et al., 1986; Reinecke, 1991). The Theodule Glacier unit is juxtaposed to the Zermatt-Saas zone and shares a comparable Alpine metamorphic and deformation history. This tectonic unit is composed of complex interlayering between mafic and felsic rocks interpreted as a volcanoclastic to sedimentary sequence that potentially also has relics of Permian metamorphism (Bucher et al., 2019). However, most of the investigated samples come from rock types that were extensively hydrated prior to subduction and show garnet zoning indicative of prograde dehydration reactions (Bovay et al., 2022). The metamorphic peak *P* (pressure) reached eclogitic conditions (2.65 ± 0.10 GPa and 580 ± 15 °C) and was dated at ~50 Ma (Bovay et al., 2022). During exhumation the tectonic unit was exposed to fluid–rock interaction and subsequent reheating of ~30 °C, starting at 555 ± 15 °C, at a pressure of 1.50 ± 0.10 GPa (Bovay et al., 2021, 2022).

The list of samples, pictures and sample localities are presented in Fig. 1 and Table 1. The samples are described in the following based on the position of their protoliths within the oceanic crust.

The first set of samples comes from ultramafic rocks and associated dykes and comprises garnets from the ugrandite family. Sample B2090 is a dark brown to black garnet in a chlorite matrix. Two emerald green samples are identified as Cr-rich andradite (A4544 and 35046); the ZTUv sample occurs in metasomatised mafic dyke in serpentinite (Kempf et al., 2020). The garnet specimens are up to 3 mm in diameter, and green Cr-rich andradite surrounds Cr-rich spinel relics. The rest of the vein is mainly composed of chlorite and microcrystalline brown andradite. Light green to yellow garnet B7415 is characteristic of demantoid (a variety of nearly pure andradite) found in association with asbestos. Sample ZTAdr is a vein containing brown single garnet grains visible at the surface of a serpentinite block from an exposed vein. Grossular-rich garnet was also found among serpentinites and is likely related to mafic dykes that have undergone massive fluid–rock interactions at the oceanic stage (rodingites). Samples B7419 is a dark orange, well-crystallised grossular–andradite. Sample ZTRod is a rodingite consisting of a 60 cm

**Table 1.** Sample list, rock types, localities and mineral assemblages.

| Group | Name     | Rock type               | Locality/tectonometamorphic unit      | GPS location                    | Assemblage (host rock) | Grt composition            | Grt grain size (mm) |
|-------|----------|-------------------------|---------------------------------------|---------------------------------|------------------------|----------------------------|---------------------|
| G1    | Z17TB04B | Mafic fels              | Theodule Glacier unit (TGU)           | 45°58'17.5" N, 7°42'38.244" E   | Grt–Diop–Amp–Qtz–Calc  | Alm50–59 Grs32–43 Pyr7     | 1–3                 |
| G1    | Z17TB07  | Mafic fels              | TGU                                   | 45°58'17.5" N, 7°42'38.244" E   | Grt–Diop–Amp–Qtz       | Alm40–51 Grs39–40 Sps1–15  | 1–4                 |
| G1    | Z10A     | Mafic schist            | TGU                                   | 45°58'12.5" N, 7°42'37.544" E   | Grt–white mica–Zo–Qtz  | Alm59–65 Grs25–27 Pyr6–14  | 0.5–3               |
| G1    | Z18TB15  | Mafic fels              | TGU                                   | 45°58'20.9" N, 7°42'34.8" E     | Grt–Omp–Amp            | Alm51–53 Grs27–34 Pyr4–14  | 0.5–2               |
| G1    | Z17TB03A | Grt-schist              | TGU                                   | 45°58'18.652" N, 7°42'35.682" E | Grt–Qtz–white mica–Zo  | Alm62–68 Grs17–27 Pyr7–13  | 1.5–30              |
| G1    | Z17Sps   | Garnetite               | Trockener Steg (ZS)                   | 45°58'21" N, 7°43'12" E         | Grt–phengite–Qtz       | Sps48–55 Alm18–22 Grs12–13 | 0.015–0.060         |
| G2    | Z17Rod   | Meta-rodingite          | Wängle–Untereif (ZS)                  | 45°57'56.5914" N, 7°43'12" E    | Grt–Diop–Chl           | Grs74–81 Adr16–24          | 1–10                |
| G2    | B7419    | Meta-rodingite          | Täschthal bei Zermatt (ZS)            | Nat. Hist. Museum of Bern       | Grt                    | Grs68 Adr23                | 1–10                |
| G2    | Z17Carb  | Calc-silicate           | Trockener Steg (ZS)                   | 45°58'23" N, 7°43'12" E         | Grt–Calc               | Grs80 Adr10                | 0.5–10              |
| G2    | 35046    | Loose sample            | Riffelhorn (ZS)                       | Nat. Hist. Museum of Bern       | Grt                    | Grs41 Uv31 Adr26           | ?*                  |
| G3    | B7415    | Loose sample            | Rimplfischwang (ZS)                   | Nat. Hist. Museum of Bern       | Grt + Asbestos         | Adr95 Grs5                 | 1–3                 |
| G3    | A4544    | Loose sample            | Riffelhorn, Zermatt (ZS)              | Nat. Hist. Museum of Bern       | Grt                    | Adr75 Uv22 Grs3            | ?                   |
| G3    | ZTUv     | Grt in mafic dyke       | Wängle–Untereif (ZS)                  | 45°57'56.5914" N, 7°44'5.928" E | Grt (± Uv-rich)        | Adr63–79 Uv3–26 Grs6–8     | 0.5–2               |
| G3    | ZTAdr    | Grt vein in ultramafics | Wängle–Untereif (ZS)                  | 45°57'51.568" N, 7°43'53.148" E | Grt                    | Adr63 Grs30 CaTiGrt6       | 2–3                 |
| G3    | B2090    | Chlorite schist         | Zermatt end moraine Gomergetsehe (ZS) | Nat. Hist. Museum of Bern       | Grt–Chl                | Adr62 Grs23 CaTiGrt13      | 0.1–20              |

\* The ? means that the specimen is a microcrystalline aggregate, and the grain size is hard to estimate.

### Group 1 - Almandine ( $\text{Fe}^{2+}/\text{Al}^{3+}$ )- rich garnets

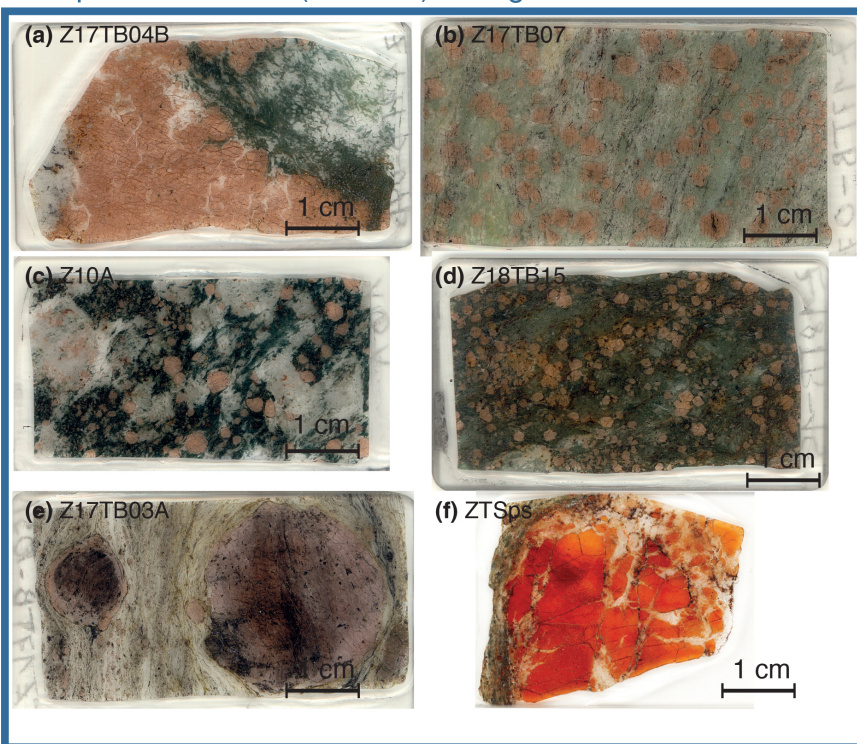

### Group 2 - Grossular ( $\text{Ca}^{2+}/\text{Al}^{3+}$ )- rich garnets

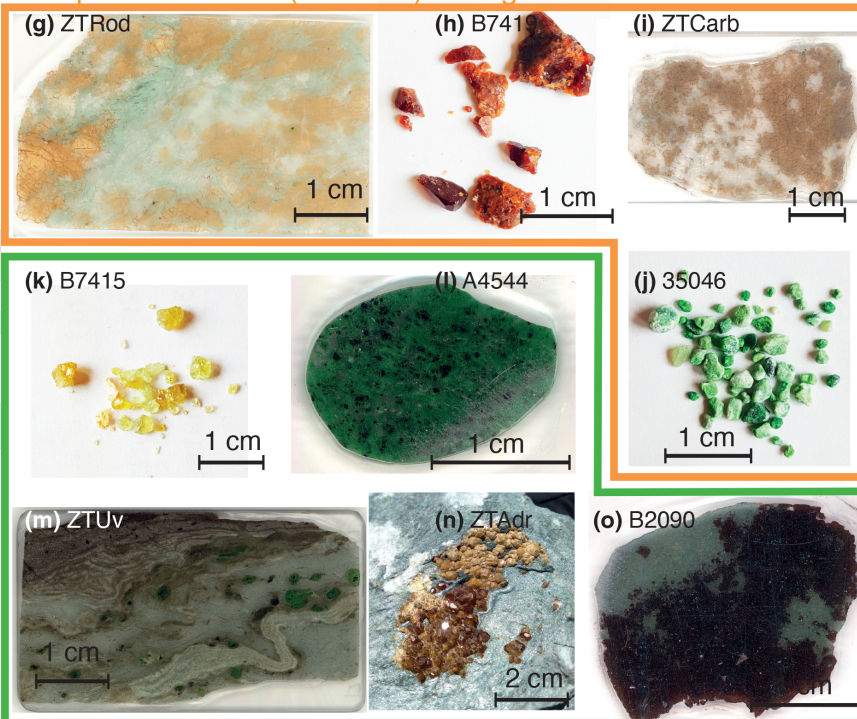

### Group 3 - Andradite ( $\text{Ca}^{2+}/\text{Fe}^{3+}$ )- rich garnets

**Figure 1.** Optical image of analysed samples. (a–f) Group 1 samples: (a–e) almandine–grossular-rich garnets and (f) almandine–spessartine-rich garnet. (g–i) Group 2 samples: grossular-rich granite. (k–o) Group 3 samples: andradite-rich granite. All pictures were acquired using either an optical scanner (for thick sections) or a camera (for single grains).

large mafic boudin in the ultramafic rocks (Kempf et al., 2020). The rock is composed of diopside and grossular in subequal proportions with minor chlorite.

The mafic rocks were sampled from the Theodule Glacier unit (Bovay et al., 2022). Sample Z18TB15 is a mafic fels part of a 10 m thick eclogitic body. The mineral assemblage is garnet–omphacite–amphibole. Sample Z17TB04B was taken from an undeformed crosscutting vein in a mafic boudin. The mineral assemblage consists of diopside and garnet with minor amounts of amphibole, quartz and calcite. The vein edge is lined with euhedral garnets. Sample Z17TB07 is a mafic fels that is part of a metre-sized mafic boudin located within a metasedimentary layer and consists of garnet–diopside–amphibole–zoisite formed from a metasomatised Ca-enriched and Na-depleted mafic rock.

The sedimentary cover presents a variety of rock types. Sample Z10A is a foliated mafic schist. The mineral assemblage is garnet (Grt)-white mica-quartz-zoisite, with occurrences of diamond-shaped pseudomorphs after lawsonite consisting of white mica, zoisite and quartz. Sample Z17TB03A is a Grt-schist, where the mineral assemblage quartz-white mica-zoisite defines the main foliation. Large, centimetre-sized garnet porphyroblasts are euhedral with a core rich in inclusions (quartz, zoisite, pyrite and graphite) and a distinct rim. This sample has potentially recorded a polymetamorphic history with a core formed during LP-HT (low-pressure, high-temperature) Permian metamorphism and a rim related to HP-LT (high-pressure, low-temperature) Alpine metamorphism (Bucher et al., 2019). Sample ZTCarb is a metacarbonate composed mainly of calcite and garnet. Finally, sample ZTSps is a nearly pure garnetite of 10 cm diameter that was identified as a metasedimentary former Mn nodule. The grain size is very small, in the range of 15–60  $\mu\text{m}$ . Some zones are optically darker than others. Minor quartz and phengite occur interstitially.

### 3 Analytical methods

#### 3.1 Electron probe micro analysis (EPMA)

The major-element composition of garnet was determined using a JEOL JXA 8200 superprobe at the Institute of Geological Sciences, University of Bern. Thick sections and epoxy mounts were polished down to 1/4  $\mu\text{m}$  with diamond paste and carbon coated. The accelerating voltage was set to 15 kV and the beam current to 20 nA for conventional spot analyses. A set of X-ray maps was also acquired using the same accelerating voltage of 15 kV and a beam current of 100 nA. The following elements were measured – Si, Ti, Al, Cr, V, Fe, Mn, Mg and Ca – and calibrated using a set of natural and synthetic standards. Na was not considered because it was < 0.05 wt % near or below the limit of detection. Peak and background were measured for 20 and 2  $\times$  10 s, respectively, for spot analyses, and a dwell time

of 150 ms was used for mapping. The maps were calibrated and further analysed using XMapTools 3.2.1 (Lanari et al., 2014, 2019). No time-related intensity drift was observed using the monitoring tools available in XMapTools (see discussion and examples in Lanari et al., 2019). The normalisation was realised using an in-house MATLAB<sup>®</sup> program for 8 cations and 24 charges. The ratio  $\text{Fe}^{2+} / \text{Fe}^{3+}$  was computed based on charge compensation. The amount of  $\text{H}_2\text{O}$  measured by infrared spectroscopy was taken into account in the normalisation, with H taking place as an  $\text{H}_4^{4+}$  cation in the garnet structural formula. The endmember proportions were calculated based on the octahedral occupancy and secondly corrected by dodecahedral occupancy. CaTiGrt represents a simplified endmember corresponding to the substitution  $\text{Al}^{3+}\text{Si}^{4+} \leftrightarrow \text{Ti}^{4+}(\text{Fe}^{3+}, \text{Al}^{3+})$ .

#### 3.2 Fourier transform infrared spectroscopy (MCT-FPA detectors)

FTIR measurements were acquired at the University of Bern using a Bruker FTIR coupled with a HYPERION microscope, equipped with a Plexiglas chamber with controlled airflow and moisture control to limit environmental variations in  $\text{CO}_2$  and  $\text{H}_2\text{O}$  (relative humidity < 10 %). This chamber is a key tool to achieve a high signal to noise ratio, which leads to optimal limits of detection. The instrument has two detectors, a single-spot nitrogen-cooled mercury telluride (MCT) detector and a focal plan array (FPA) detector – composed of  $64 \times 64 = 4096$  MCT detectors covering a measurement grid of 172.8  $\mu\text{m}$  side length and enabling a minimum pixel size of 2.8  $\mu\text{m}$ . For more details about the method used for FPA mapping, see Reynes et al. (2020). This mapping detector has a lower signal to noise ratio due to the size of the MCT elements leading to higher limits of detection. It is therefore only appropriate for high water contents (over 200  $\mu\text{g g}^{-1} \text{H}_2\text{O}$  for a 250  $\mu\text{m}$  thick section). For mapping of garnet with low water content (< 100  $\mu\text{g g}^{-1} \text{H}_2\text{O}$ ) it was preferred to use the MCT single-spot detector with a 25–50  $\mu\text{m}$  aperture and a low number of scans to map efficiently the grain.

Measurements were realised on all garnets with a 15 $\times$  objective and a 4  $\text{cm}^{-1}$  (8  $\text{cm}^{-1}$  for low-OH, almandine-rich garnet) spectral resolution by transmission infrared spectroscopy. In the case of complete absorbance due to high water contents (over 1500  $\mu\text{g g}^{-1} \text{H}_2\text{O}$ ), the sample was either thinned down or measured with the attenuated total reflectance (ATR) objective. This objective is composed of a germanium crystal tip that is in contact with the sample, enabling measurement of a small interaction volume near the surface (penetration depth < 1  $\mu\text{m}$ ) and high water contents (up to wt %). To improve signal quality, it is necessary to measure spectra with 8  $\text{cm}^{-1}$  resolution. A concave rubber-band baseline correction (OPUS<sup>®</sup>) was applied to the spectra with 64 points and 4 iterations. Integration method B from OPUS<sup>®</sup> was used in the OH absorption of garnet (3400–

3700 cm<sup>-1</sup>) with boundaries specific for each garnet. The total absorbance is obtained by dividing the integrated area by the sample thickness to obtain the absorption per centimetre. The OH content is then obtained by multiplying the total absorbance by the absorption coefficient  $k_{\text{abs}}$ . For each sample,  $k_{\text{abs}}$  is computed using the following relationship:

$$k_{\text{abs}} = \frac{c \times M_{\text{H}_2\text{O}}}{d \times \varepsilon}, \quad (1)$$

where  $c = 1 \times 10^6$  is the constant of conversion from grams per gram to micrograms per gram of H<sub>2</sub>O,  $M_{\text{H}_2\text{O}}$  is the molar mass of H<sub>2</sub>O,  $d$  is the density of the garnet (in g L<sup>-1</sup>; computed from EPMA analysis), and  $\varepsilon$  is the integral molar extinction coefficient (calibration coefficient) determined by an independent method and mineral specific. The coefficient from Maldener et al. (2003) for grossular,  $\varepsilon = 14\,400 \text{ L mol}^{-1} \text{ cm}^{-2}$ , was chosen for grossular- and andradite-rich garnet specimens, as previous studies have shown it to be appropriate for these garnet compositions (Reynes et al., 2018, 2020). In the case of almandine-rich garnet specimens, including the spessartine-almandine solid-solution ZTSps, the coefficient of Bell et al. (1995) for pyrope-almandine garnet,  $\varepsilon = 6700 \text{ L mol}^{-1} \text{ cm}^{-2}$ , was used as there is no other robust calibration available for almandine-rich garnet. Maldener et al. (2003) provided various coefficients for very similar compositions of almandine-rich garnet (2370–6340 L mol<sup>-1</sup> cm<sup>-2</sup>), calibrated by nuclear reaction analysis on garnet with H<sub>2</sub>O contents near the detection limit (< 50 µg g<sup>-1</sup> H<sub>2</sub>O). The coefficient of Bell et al. (1995) presents two advantages. Firstly, compared to the range of coefficients determined by Maldener et al. (2003), it represents a conservative estimate of the water content. Secondly, most of the previous studies that evaluated water in eclogitic garnets did use this coefficient (Katayama et al., 2006; Schmädicke and Gose, 2020; Gose and Schmädicke, 2018; Schmädicke and Gose, 2017), and thus this facilitates the comparison of our results for garnets from the Zermatt-Saas area with other localities.

The thickness of all samples was measured using a Mitutoyo<sup>®</sup> micrometre with an accuracy of  $\pm 2 \mu\text{m}$ . Additionally, the overtone domain (1550–2000 cm<sup>-1</sup>) was integrated for each spectrum as well, which enables in situ thickness determination using

$$\text{Thickness } (\mu\text{m}) = r \times \text{Abs}(1550 - 2000 \text{ cm}^{-1}). \quad (2)$$

The constant  $r$  is the ratio between the measured thickness of the sample using a mechanical micrometre and the average overtone area of the analysed sample. This advantage is twofold: (1) it corrects the possible edge effect on transects when measuring grains that are slightly thicker in their core than in their rim due to the polishing method, and (2) it excludes spectra that are not characteristic of garnet. The value of  $r$  varies from andradite-grossular- (CE14) ( $r = 1.20$ – $1.30$ ) to almandine-rich garnets ( $r = 1.40$ – $1.44$ ).

### 3.3 Diffusion modelling

A MATLAB<sup>®</sup> algorithm was developed to model hydrogen diffusion in garnet over short and long timescales. A 2D diffusion equation in a semi-infinite medium was used (Crank, 1975, p. 150, Eq. 8.46). It assumes the garnet to be infinite in the third dimension; this can cause minor artefacts (diffusion mechanism may be slightly faster than modelled).

$$\frac{\partial C}{\partial t} = D \left( \frac{\partial^2 C}{\partial x^2} + \frac{\partial^2 C}{\partial y^2} \right), \quad (3)$$

where  $D$  is the diffusion coefficient (in m<sup>2</sup> s<sup>-1</sup>) and  $C(x, y, t)$  the mass fraction of H<sub>2</sub>O in garnet (in µg g<sup>-1</sup> H<sub>2</sub>O). A 2D numerical solution was used to approximate  $C(x, y, t)$  by the discrete function  $c_{i,j}^n$ , where  $x = i \Delta x$ ,  $y = j \Delta y$  and  $t = n \Delta t$ . The finite difference approximation is

$$\frac{c_{i,j}^{n+1} - c_{i,j}^n}{\Delta t} = D \left[ \frac{c_{i+1,j}^n - 2c_{i,j}^n + c_{i-1,j}^n}{(\Delta x)^2} + \frac{c_{i,j+1}^n - 2c_{i,j}^n + c_{i,j-1}^n}{(\Delta y)^2} \right]. \quad (4)$$

The state of the system at step  $n+1$  ( $c_{i,j}^{n+1}$ ) can then be calculated from its state at time step  $n$  ( $c_{i,j}^n$ ). The maximum time step  $\Delta t$  that is possible to prevent the solution from becoming unstable is given by

$$\Delta t_{\text{max}} = \frac{1}{2D} \frac{(\Delta x \Delta y)^2}{(\Delta x)^2 + (\Delta y)^2}. \quad (5)$$

The algorithm takes as entry a hypothetical OH content map of the crystal with water zoning, a diffusion coefficient (in m<sup>2</sup> s<sup>-1</sup>) and a total duration time in seconds (s) for the experiment. It returns the computed OH maps at different time steps from initial to the end of the duration of the experiment.

## 4 Results

### 4.1 Chemical composition of garnet

Representative chemical compositions of garnet samples are reported in Table 2. For some samples, chemical maps were acquired on selected grains, and characteristic chemical maps are represented in Figs. 2 and 3 (other endmember maps are available in Fig. S1, available online as the Supplement linked to this article on the website of the journal <https://ejm.copernicus.org/>, last access: TSS). Three groups of garnet are described below.

Group 1 (Fig. 1) consists of almandine-rich garnets (Alm<sub>40–68</sub>) with relatively high grossular (Grs<sub>12–43</sub>) and variable proportions in other endmembers. Most of them are presenting core to rim chemical zoning, as highlighted by Fig. 2. Sample Z17TB04B is showing a rim enriched in CaO (15.33 wt %) compared to its core (11.51 wt %),

Table 2. Representative composition of garnet analysed in the study determined by EPMA.

|                                               | Z17TB04B   |             | Z17TB07    |               | Z10A        |            | Z18TB15     |            | Z17TB03A    |             | ZTSps          |             | ZTRod |       | B7419         |                | ZTCarb       |             | 35046        |              | B7415        |              | A4544        |               | Z1Tuv        |             | ZTAdr       |              | B2090        |      |
|-----------------------------------------------|------------|-------------|------------|---------------|-------------|------------|-------------|------------|-------------|-------------|----------------|-------------|-------|-------|---------------|----------------|--------------|-------------|--------------|--------------|--------------|--------------|--------------|---------------|--------------|-------------|-------------|--------------|--------------|------|
|                                               | Rim<br>(4) | Core<br>(6) | Rim<br>(7) | Mantle<br>(7) | Core<br>(7) | Rim<br>(8) | Core<br>(5) | Rim<br>(8) | Core<br>(8) | Rim<br>(10) | Mantle<br>(10) | Core<br>(7) | L MnZ | HMnZ  | Type I<br>(4) | Type II<br>(3) | Mean<br>(10) | Mean<br>(5) | Mean<br>(10) | Mean<br>(10) | Mean<br>(10) | Mean<br>(10) | Mean<br>(10) | CoreZ<br>(10) | RimZ<br>(10) | Mean<br>(8) | Mean<br>(8) | Mean<br>(20) | Mean<br>(20) |      |
| SiO <sub>2</sub>                              | 38.63      | 38.14       | 38.30      | 37.97         | 37.96       | 38.49      | 37.94       | 37.40      | 37.07       | 38.22       | 38.46          | 38.50       | 37.05 | 37.20 | 36.88         | 37.50          | 37.73        | 38.50       | 36.88        | 35.48        | 35.54        | 35.48        | 35.54        | 34.42         | 34.42        | 34.92       | 36.02       | 34.09        | 34.09        |      |
| TiO <sub>2</sub>                              | 0.12       | 0.10        | 0.07       | 0.11          | 0.13        | 0.04       | 0.10        | 0.04       | 0.14        | 0.10        | 0.02           | 0.08        | 0.19  | 0.16  | 0.10          | 0.29           | 0.84         | 0.97        | 0.26         | 0.11         | 0.11         | 0.11         | 0.11         | 2.49          | 1.53         | 1.85        | 4.00        | 4.00         | 4.00         |      |
| Al <sub>2</sub> O <sub>3</sub>                | 21.51      | 21.44       | 21.56      | 21.25         | 21.20       | 22.51      | 22.17       | 21.30      | 20.51       | 21.40       | 21.50          | 21.53       | 20.14 | 20.19 | 17.08         | 18.84          | 15.75        | 19.54       | 8.83         | 0.86         | 0.28         | 0.86         | 0.28         | 1.33          | 1.30         | 5.60        | 4.25        | 4.25         | 4.25         |      |
| Cr <sub>2</sub> O <sub>3</sub>                | 0.02       | 0.01        | 0.01       | 0.01          | 0.01        | 0.02       | 0.02        | 0.04       | 0.03        | 0.01        | 0.02           | 0.01        | bdl   | bdl   | 0.02          | 0.10           | 0.01         | 0.02        | 0.01         | bdl          | 6.68         | bdl          | 6.68         | 1.44          | 7.94         | bdl         | 0.08        | 0.08         | 0.08         |      |
| FeO <sup>a</sup>                              | 22.80      | 27.01       | 23.81      | 21.47         | 18.85       | 27.71      | 29.91       | 26.18      | 24.33       | 30.01       | 31.43          | 28.61       | 12.94 | 10.21 | 7.23          | 4.81           | 10.12        | 5.38        | 8.01         | 27.16        | 21.43        | 22.67        | 18.13        | 19.53         | 19.53        | 19.53       | 19.53       | 19.53        | 19.53        |      |
| Fe <sub>2</sub> O <sub>3</sub> <sup>159</sup> | 0.01       | 0.18        | 0.21       | 0.54          | 0.49        | 0.31       | 0.13        | 1.89       | 1.41        | 0.01        | 0.19           | 0.01        | 2.91  | 2.27  | 8.02          | 5.35           | 7.86         | 3.30        | 8.69         | 30.18        | 23.51        | 25.19        | 20.14        | 20.14         | 20.14        | 20.14       | 19.87       | 19.87        | 19.87        |      |
| FeO                                           | 22.79      | 26.85       | 23.62      | 20.98         | 18.41       | 27.43      | 29.79       | 24.48      | 23.06       | 30.00       | 31.26          | 28.60       | 10.32 | 8.17  | 0.01          | 0.00           | 3.05         | 2.41        | 0.19         | 0.00         | 0.28         | 0.00         | 0.01         | 1.09          | 1.09         | 1.67        | 1.67        | 1.67         | 1.67         |      |
| MnO                                           | 0.32       | 0.71        | 0.44       | 4.12          | 6.98        | 0.18       | 0.30        | 0.07       | 3.24        | 0.23        | 0.67           | 2.35        | 22.07 | 25.39 | 0.95          | 0.79           | 0.32         | 0.30        | 0.53         | 0.04         | 0.05         | 0.22         | 0.31         | 0.23          | 0.31         | bdl         | bdl         | bdl          | bdl          |      |
| MgO                                           | 1.73       | 1.89        | 1.99       | 0.77          | 0.61        | 3.75       | 1.54        | 3.64       | 0.93        | 1.77        | 3.47           | 2.35        | 2.26  | 1.85  | 0.07          | 0.18           | bdl          | 0.51        | bdl          | bdl          | bdl          | 0.55         | 0.16         | 0.16          | bdl          | bdl         | bdl         | bdl          | bdl          |      |
| CaO                                           | 15.33      | 11.51       | 14.23      | 14.81         | 14.79       | 9.18       | 9.86        | 10.71      | 12.84       | 9.62        | 6.15           | 9.88        | 6.05  | 5.85  | 34.85         | 34.77          | 33.45        | 33.98       | 34.28        | 33.51        | 33.07        | 33.07        | 33.66        | 34.01         | 34.27        | 33.85       | 33.85       | 33.85        | 33.85        |      |
| H <sub>2</sub> O*                             | 0.010      | 0.004       | 0.004      | 0.008         | 0.010       | 0.001      | 0.004       | 0.001      | 0.005       | 0.003       | 0.001          | 0.002       | 0.003 | 0.026 | 0.039         | 0.046          | 0.184        | 0.131       | 0.161        | 0.054        | 0.047        | 0.054        | 0.047        | 0.350         | 0.208        | 0.249       | 0.249       | 0.500        | 0.500        |      |
| Total                                         | 100.5      | 100.8       | 100.5      | 100.6         | 100.6       | 101.9      | 101.8       | 99.56      | 99.23       | 101.4       | 101.7          | 101.5       | 101.0 | 101.1 | 98.00         | 97.86          | 99.20        | 99.65       | 99.44        | 100.1        | 99.56        | 99.65        | 100.5        | 99.65         | 100.5        | 99.82       | 99.82       | 98.62        | 98.62        |      |
| Si                                            | 3.017      | 2.996       | 2.995      | 2.990         | 2.992       | 2.966      | 2.967       | 2.950      | 2.977       | 3.004       | 3.003          | 3.007       | 2.955 | 2.969 | 2.908         | 2.932          | 2.964        | 2.950       | 2.974        | 2.980        | 3.002        | 2.980        | 3.002        | 2.880         | 2.900        | 2.950       | 2.844       | 2.844        | 2.844        |      |
| Ti                                            | 0.007      | 0.006       | 0.004      | 0.007         | 0.008       | 0.003      | 0.006       | 0.002      | 0.008       | 0.006       | 0.001          | 0.005       | 0.011 | 0.010 | 0.006         | 0.017          | 0.050        | 0.056       | 0.016        | 0.000        | 0.007        | 0.000        | 0.007        | 0.157         | 0.096        | 0.114       | 0.251       | 0.251        | 0.251        |      |
| Al                                            | 1.980      | 1.985       | 1.988      | 1.972         | 1.969       | 2.044      | 2.044       | 1.980      | 1.942       | 1.983       | 1.979          | 1.982       | 1.893 | 1.899 | 1.587         | 1.737          | 1.458        | 1.765       | 0.839        | 0.085        | 0.028        | 0.085        | 0.028        | 0.131         | 0.127        | 0.541       | 0.417       | 0.417        | 0.417        |      |
| Cr                                            | 0.001      | 0.001       | 0.001      | 0.000         | 0.001       | 0.001      | 0.001       | 0.003      | 0.002       | 0.001       | 0.001          | 0.001       | 0.000 | 0.000 | 0.001         | 0.006          | 0.001        | 0.001       | 0.013        | 0.000        | 0.000        | 0.000        | 0.000        | 0.000         | 0.000        | 0.000       | 0.005       | 0.005        | 0.005        |      |
| Fe <sup>3+</sup>                              | 0.001      | 0.011       | 0.012      | 0.032         | 0.029       | 0.018      | 0.008       | 0.112      | 0.085       | 0.001       | 0.011          | 0.001       | 0.175 | 0.136 | 0.476         | 0.315          | 0.465        | 0.190       | 0.527        | 1.908        | 1.494        | 1.494        | 1.586        | 1.258         | 1.263        | 1.248       | 1.248       | 1.248        | 1.248        |      |
| Fe <sup>2+</sup>                              | 1.488      | 1.764       | 1.545      | 1.382         | 1.214       | 1.767      | 1.949       | 1.615      | 1.549       | 1.972       | 2.041          | 1.868       | 0.689 | 0.546 | 0.001         | 0.000          | 0.201        | 0.154       | 0.013        | 0.000        | 0.020        | 0.000        | 0.000        | 0.000         | 0.075        | 0.116       | 0.116       | 0.116        | 0.116        |      |
| Mn                                            | 0.021      | 0.048       | 0.029      | 0.275         | 0.466       | 0.012      | 0.020       | 0.004      | 0.020       | 0.015       | 0.045          | 0.037       | 1.491 | 1.717 | 0.063         | 0.052          | 0.021        | 0.019       | 0.036        | 0.003        | 0.004        | 0.003        | 0.016        | 0.022         | 0.016        | 0.022       | 0.022       | 0.022        | 0.022        |      |
| Mg                                            | 0.202      | 0.222       | 0.232      | 0.091         | 0.072       | 0.431      | 0.179       | 0.428      | 0.112       | 0.207       | 0.404          | 0.274       | 0.269 | 0.220 | 0.008         | 0.021          | 0.000        | 0.058       | 0.000        | 0.000        | 0.000        | 0.000        | 0.068        | 0.020         | 0.000        | 0.000       | 0.000       | 0.000        | 0.000        |      |
| Ca                                            | 1.282      | 0.969       | 1.193      | 1.250         | 1.249       | 0.758      | 0.826       | 0.906      | 1.105       | 0.811       | 0.514          | 0.827       | 0.517 | 0.500 | 2.944         | 2.913          | 2.816        | 2.790       | 2.961        | 3.016        | 2.993        | 3.017        | 3.026        | 3.007         | 3.026        | 3.007       | 3.026       | 3.026        | 3.026        |      |
| H <sub>4</sub>                                | 0.001      | 0.001       | 0.001      | 0.001         | 0.001       | 0.000      | 0.001       | 0.000      | 0.001       | 0.000       | 0.000          | 0.000       | 0.000 | 0.003 | 0.005         | 0.006          | 0.024        | 0.017       | 0.022        | 0.008        | 0.007        | 0.008        | 0.007        | 0.049         | 0.029        | 0.034       | 0.070       | 0.070        | 0.070        |      |
| CaTi-grt                                      | 0.00       | 0.00        | 0.00       | 0.00          | 0.00        | 0.00       | 0.00        | 0.00       | 0.00        | 0.00        | 0.00           | 0.00        | 0.01  | 0.00  | 0.00          | 0.01           | 0.02         | 0.03        | 0.01         | 0.000        | 0.000        | 0.000        | 0.008        | 0.05          | 0.06         | 0.13        | 0.13        | 0.13         | 0.13         |      |
| Adr                                           | 0.00       | 0.01        | 0.01       | 0.02          | 0.01        | 0.01       | 0.00        | 0.06       | 0.04        | 0.00        | 0.01           | 0.00        | 0.09  | 0.07  | 0.24          | 0.16           | 0.23         | 0.10        | 0.26         | 0.954        | 0.75         | 0.954        | 0.75         | 0.79          | 0.63         | 0.63        | 0.62        | 0.62         | 0.62         |      |
| Uv                                            | 0.00       | 0.00        | 0.00       | 0.00          | 0.00        | 0.00       | 0.00        | 0.00       | 0.00        | 0.00        | 0.00           | 0.00        | 0.00  | 0.00  | 0.00          | 0.00           | 0.00         | 0.00        | 0.31         | 0.000        | 0.22         | 0.000        | 0.22         | 0.05          | 0.26         | 0.00        | 0.00        | 0.00         | 0.00         |      |
| Grs                                           | 0.43       | 0.32        | 0.39       | 0.40          | 0.40        | 0.25       | 0.27        | 0.27       | 0.34        | 0.27        | 0.17           | 0.27        | 0.12  | 0.13  | 0.74          | 0.81           | 0.68         | 0.80        | 0.41         | 0.046        | 0.03         | 0.046        | 0.03         | 0.08          | 0.06         | 0.30        | 0.23        | 0.23         | 0.23         |      |
| Sps                                           | 0.01       | 0.02        | 0.01       | 0.09          | 0.15        | 0.00       | 0.01        | 0.00       | 0.07        | 0.01        | 0.01           | 0.01        | 0.48  | 0.55  | 0.02          | 0.02           | 0.01         | 0.01        | 0.01         | 0.000        | 0.000        | 0.000        | 0.000        | 0.000         | 0.000        | 0.000       | 0.000       | 0.000        | 0.000        |      |
| Alm                                           | 0.50       | 0.59        | 0.51       | 0.46          | 0.40        | 0.59       | 0.65        | 0.53       | 0.51        | 0.66        | 0.68           | 0.62        | 0.22  | 0.18  | 0.00          | 0.00           | 0.06         | 0.05        | 0.00         | 0.000        | 0.000        | 0.000        | 0.000        | 0.000         | 0.000        | 0.01        | 0.01        | 0.01         | 0.01         |      |
| Pyr                                           | 0.07       | 0.07        | 0.08       | 0.03          | 0.02        | 0.14       | 0.06        | 0.14       | 0.04        | 0.07        | 0.13           | 0.09        | 0.09  | 0.07  | 0.00          | 0.01           | 0.00         | 0.02        | 0.00         | 0.000        | 0.000        | 0.000        | 0.000        | 0.000         | 0.000        | 0.000       | 0.000       | 0.000        | 0.000        |      |
| Density                                       | 3.89       | 3.96        | 3.91       | 3.92          | 3.92        | 3.97       | 3.99        | 3.94       | 3.95        | 3.99        | 4.02           | 3.98        | 4.05  | 4.06  | 3.66          | 3.63           | 3.69         | 3.64        | 3.67         | 3.88         | 3.82         | 3.88         | 3.82         | 3.85          | 3.79         | 3.80        | 3.81        | 3.81         | 3.81         | 3.81 |
| Coef                                          | 0.69       | 0.68        | 0.69       | 0.69          | 0.68        | 0.68       | 0.67        | 0.68       | 0.67        | 0.67        | 0.67           | 0.68        | 0.31  | 0.31  | 0.34          | 0.34           | 0.34         | 0.34        | 0.34         | 0.32         | 0.33         | 0.32         | 0.33         | 0.32          | 0.33         | 0.33        | 0.33        | 0.33         | 0.33         | 0.33 |
| Cal.                                          | B          | B           | B          | B             | B           | B          | B           | B          | B           | B           | B              | B           | M     | M     | M             | M              | M            | M           | M            | M            | M            | M            | M            | M             | M            | M           | M           | M            | M            | M    |

\* Measured by FTIR: RimZ is rim zone; LMinZ is low-Mn zone and HMnZ is high-Mn zone. For these samples, an average composition was determined using the average composition of  $n$  pixels within an area and reported as mean ( $n$ ). bdl signifies below detection limit. and CaTi-grt corresponds to a simplified endmember  $\text{Ca}_{1-x}\text{Ti}_x\text{Fe}_{1-x}\text{Al}_x\text{SiO}_2$ . Coef is the calibration coefficient chosen.  $B = 6700 \text{ L mol}^{-1} \text{ cm}^{-2}$  from Bell et al. (1995);  $M = 14400 \text{ L mol}^{-1} \text{ cm}^{-2}$  from Mader et al. (2006).

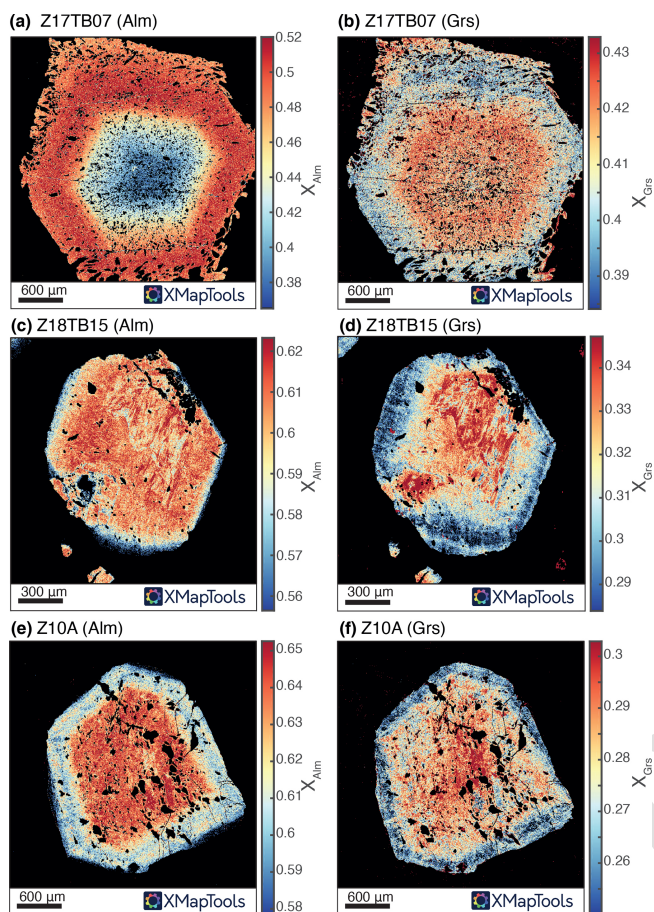

**Figure 2.** Compositional maps (endmember proportion) of garnet obtained from X-ray maps measured by EPMA and processed using the XMapTools software. (a) Map of the proportion of the almandine component ( $X_{\text{Alm}}$ ) of sample Z17TB07. (b) Map of the proportion of the grossular component ( $X_{\text{Grs}}$ ) of sample Z17TB07. (c)  $X_{\text{Alm}}$  map of sample Z18TB15. (d)  $X_{\text{Grs}}$  map of sample Z18TB15. (e)  $X_{\text{Alm}}$  map of sample Z10A. (f)  $X_{\text{Grs}}$  map of sample Z10A.

whereas samples Z18TB15 and Z10A are showing an enriched core (12.84 wt % and 9.86 wt %) compared to their rims (10.71 wt % and 9.18 wt %). Sample Z17TB03A shows a core and rim enriched in CaO (respectively 9.88 wt % and 9.62 wt %) compared to its mantle (6.15 wt %). The sample Z17TB07 has a rather constant CaO content (14 wt %–15 wt %). Sample ZTSps (Sps<sub>48–55</sub>Alm<sub>18–22</sub>Grs<sub>12–13</sub>) is included in this group, though its chemistry is more spessartine-rich (Fig. 3).

Group 2 (Fig. 1) is identified as grossular (Grs<sub>41–81</sub>) with minor components of uvarovite (Uv<sub>0–31</sub>) and andradite (Adr<sub>10–26</sub>) and very low almandine component (Alm<sub>0–6</sub>). Sample ZTCarb and B7419 display a minor almandine component (Alm<sub>5–6</sub>). Sample ZTRod is showing two garnet types (type I and type II). Type I (Grs<sub>74</sub>Adr<sub>24</sub>) is slightly richer in the andradite component compared to type II (Grs<sub>81</sub>And<sub>16</sub>). Another difference is in minor TiO<sub>2</sub> con-

tent, as type II contains 3 times more Ti compared to type I (respectively 0.10 wt % and 0.29 wt % TiO<sub>2</sub>). Sample 35046 shows the most heterogeneous garnet composition with a subequal amount of uvarovite and andradite Grs<sub>41</sub>Uv<sub>31</sub>Adr<sub>26</sub>.

Group 3 (Fig. 1) consists of andradite-rich garnet specimens (Adr<sub>62–95</sub>) with a significant proportion of substitution of Fe<sup>3+</sup> by Ti<sup>4+</sup> and/or Cr<sup>3+</sup>. Sample B7415 is a nearly pure andradite (Adr<sub>95</sub>) with a minor grossular component. Samples A4544 and ZTUv core and A4544CE15 have a main andradite component (Adr<sub>63–75</sub>) and a secondary uvarovite component (Uv<sub>22–26</sub>). Samples ZTUv rim and ZTAdr are andradite rich (Adr<sub>63–79</sub>) with ~2 wt % TiO<sub>2</sub>. For sample ZTUv, a rim enriched in Ti is clearly identifiable (up to 2.5 wt % TiO<sub>2</sub> versus 1.5 wt % TiO<sub>2</sub> in the core). Sample B2090 is a titanium andradite (And<sub>62</sub>Grs<sub>23</sub>CaTiGrt<sub>13</sub>) with the highest TiO<sub>2</sub> content reported among these garnets (4 wt % TiO<sub>2</sub>).

## 4.2 IR spectra and band positions

The FTIR spectra of the OH region of garnet (3400–3700 cm<sup>-1</sup>) are presented in Fig. 4. The spectra are shown for the groups identified in Fig. 1. The almandine-rich garnets of group 1 show rather low absorption with an OH band intensity of less than 2 for a thickness normalised to 1 cm (with the exception of sample ZTSps). The spectra are dominated by a band centred on 3550 cm<sup>-1</sup> characteristic of almandine-rich garnet as shown by Aines and Rossman (1984). Almandine-rich garnet from samples Z17TB04B, Z17TB07 and Z10A shows OH bands in the domain 3550–3650 cm<sup>-1</sup> that are in the same range of intensity as the main band at 3550 cm<sup>-1</sup>. The low-Mn zone of sample ZTSps shows a single band centred at 3555 cm<sup>-1</sup> and of similar intensity to the other almandine samples. The high-Mn zone of this sample displays five bands, 3500–3517–3560–3591CE16 and 3640 cm<sup>-1</sup>, at an intensity level of 4 times that observed for the low-Mn zone. These bands were already identified for spessartine garnet (Reynes et al., 2018). For the core of sample Z17TB07 it was impossible to avoid the numerous tiny inclusions of amphibole, and the spectrum has the form of the triplet 3646–3660–3674 cm<sup>-1</sup>. In order to estimate the water content of garnet in this sample, in this domain the absorption of the amphibole was subtracted from the measured OH absorption. Phengite is another possible hydrous phase that can occur as inclusion in garnet. Phengite has a strong absorbance band at 3623 cm<sup>-1</sup>, which was not observed in these spectra. Clinozoisite and chlorite have absorption bands at wavenumbers < 3450 cm<sup>-1</sup> and are thus easily detected. The spectra do not display any contamination of chlorite and clinozoisite.

The OH absorption bands for Ca-rich garnet (groups 2 and 3) are displayed in Fig. 4b. For these two groups, the absorbance measured is 1 order of magnitude higher than for garnet of group 1. Samples ZTCarb, B7419 and ZTRod type II are showing similar band positions, with a main doublet at

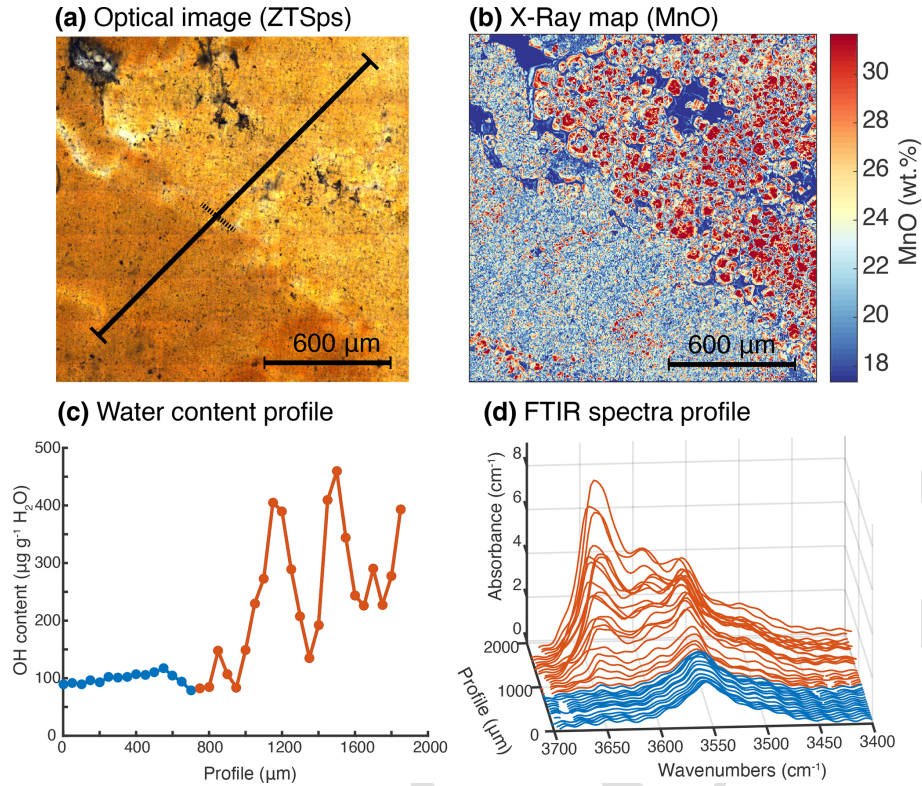

**Figure 3.** Optical image, compositional map and FTIR transects for sample ZTSps. **(a)** Optical image (transmission) of sample ZTSps highlighting dark and light zones. **(b)** MnO map expressed (in wt%) of the same area presented in **(a)**. **(c)** H<sub>2</sub>O concentration profile (expressed as  $\mu\text{g g}^{-1}$  H<sub>2</sub>O) acquired with 40  $\mu\text{m}$  step and 40  $\mu\text{m}$  spot size. The blue part corresponds to the dark, lower-Mn zones presented in **(a)**, the orange part corresponds to the light, higher-Mn zone presented in **(a)**. **(d)** Stacked FTIR spectra measured in the OH stretching region (3400–3700  $\text{cm}^{-1}$ ) across the profile with the same colour code as in **(c)**.

3596–3598 and 3611  $\text{cm}^{-1}$ . Secondary broad bands at 3557 and 3656  $\text{cm}^{-1}$  are clearly identified. The sample B7419 has a more pronounced band at 3583  $\text{cm}^{-1}$  that only appears as a shoulder in spectra from ZTCarb and ZTRod type II. The sample ZTRod type I spectrum is characterised by a doublet at 3614–3621  $\text{cm}^{-1}$ ; the band at 3621  $\text{cm}^{-1}$  does not appear on spectra from sample ZTRod type II. Grossular-uvarovite 35046 has an asymmetric main band at 3617  $\text{cm}^{-1}$  with a shoulder at around 3600  $\text{cm}^{-1}$  and a broad band at 3550  $\text{cm}^{-1}$ . Andradite garnet shows more complex spectra with up to six different bands. Near-endmember andradite garnet samples B7415 and A4544 show the simplest spectra with only two well-defined bands, the main at 3564  $\text{cm}^{-1}$  and a secondary at 3606  $\text{cm}^{-1}$ . The spectra obtained for the core of sample ZTAdr and for B2090 are very similar, with two main bands at around 3560 and 3600  $\text{cm}^{-1}$  and shoulders at 3580 and 3640  $\text{cm}^{-1}$ . Despite these similarities, the position of the main bands is not identical, with one located at 3557  $\text{cm}^{-1}$  for sample B2090 and at 3561  $\text{cm}^{-1}$  for ZTAdr. The second main bands are at 3600  $\text{cm}^{-1}$  for sample ZTAdr and at 3607  $\text{cm}^{-1}$  for sample B2090. Sample ZTUv shows similar band positions for the core and the rim spectra, and only intensities appear to change. The main doublet at 3565–

3576  $\text{cm}^{-1}$  is followed by a well-defined band at 3605  $\text{cm}^{-1}$  and some minor shoulders at 3620 and 3640  $\text{cm}^{-1}$ .

#### 4.3 OH content in garnet and effect of chemical composition

Table 3 reports the total absorbance (integrated area per centimetre) and OH contents calculated for each sample (formally expressed in  $\mu\text{g g}^{-1}$  H<sub>2</sub>O). The range of OH contents measured in a sample is indicated with minimum and maximum values. The column “mean” gives the average and the standard deviation of the measured data. For analyses of group 1 the OH content ranges from 2 to 115  $\mu\text{g g}^{-1}$  H<sub>2</sub>O with the exception of the spessartine-rich garnet in sample ZTSps that reaches 550  $\mu\text{g g}^{-1}$  H<sub>2</sub>O (Table 3). Analyses from group 2 show higher OH contents from 180 to 2400  $\mu\text{g g}^{-1}$  H<sub>2</sub>O. Sample ZTRod is showing the lowest range of OH content (172–524  $\mu\text{g g}^{-1}$  H<sub>2</sub>O), while other samples of this group have over 1000  $\mu\text{g g}^{-1}$  H<sub>2</sub>O. Analyses from group 3 display the highest measured water content, from 400 to 5900  $\mu\text{g g}^{-1}$  H<sub>2</sub>O. Nevertheless, high disparities appear in this group, with samples B7415 and A4544 showing moderate water contents (400–740  $\mu\text{g g}^{-1}$  H<sub>2</sub>O),

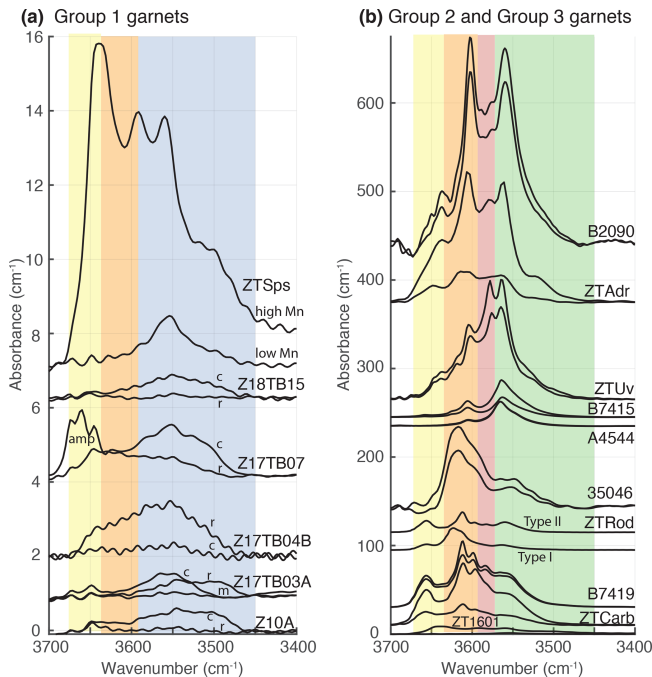

**Figure 4.** Infrared spectra in the OH stretching domain of garnet ( $3400\text{--}3700\text{ cm}^{-1}$ ). All intensities are normalised to a thickness of 1 cm. In (a), group 1 samples as defined in Fig. 1 (almandine-rich garnet) and, in (b), the group 2 and 3 samples (Ca-rich garnet) are represented. For all samples, at least two spectra are plotted to show the diversity of spectra acquired in the same grain. Colour stripes correspond to wavenumber domains associated with OH defects for common garnet endmembers: in blue for almandine, orange and yellow for grossular, green for andradite, and red for Ti-rich garnet. More details are given in the text. Band abbreviations: c – core; m – mantle; r – rim; amp – amphibole bands.

whereas samples ZTUv, ZTAdr and B2090 display OH contents over  $1000\text{ }\mu\text{g g}^{-1}\text{ H}_2\text{O}$ . The relationship between the garnet major-element composition and the water content determined by FTIR is displayed in Fig. 5. The Ca-rich garnets of groups 2 and 3 are the most enriched in OH ( $> 350\text{ }\mu\text{g g}^{-1}\text{ H}_2\text{O}$ ; Fig. 5a, c). For group 3, the samples with the highest sum of Ca endmembers are relatively depleted in OH (e.g. samples B7415 and A4544) compared to samples ZTUv and ZTAdr. The analyses of almandine-rich garnet of group 1 show a positive correlation between the OH content and the grossular component (Fig. 5c) – there are neither andradite nor uvarovite components in these garnets. The only exception is the spessartine-rich garnet from sample ZTSps, showing that Mn enhances the capacity to incorporate  $\text{H}_2\text{O}$ . Analyses from groups 2 and 3 show a positive correlation with titanium (Fig. 5b, d). However, most analyses plot above the 1 : 1 ratio between molar Ti and H (black line) indicating that not all  $\text{H}_2\text{O}$  can be accommodated by a  $\text{Ca}_3\text{Ti}_2\text{H}_2\text{Si}_2\text{O}_{12}$  hydrous endmember (see Reynes et al., 2020). Such a close relationship between  $\text{TiO}_2$  content and  $\text{H}_2\text{O}$  is also visible on the maps of sample ZTUv (Fig. 6d, f), with a rim enriched

in both  $\text{TiO}_2$  and  $\text{H}_2\text{O}$ . Finally, analyses from group 1 display a positive correlation between  $\text{TiO}_2$  and  $\text{H}_2\text{O}$  for most samples, but data are more scattered than for groups 2 and 3 (Fig. 5d).

#### 4.4 Hydrogen zoning

Zoning of OH was investigated in all sample groups using transects and maps (Figs. 6, 7). A special focus is placed on garnet from group 1. Figures 6 and 7 display a map and transects of the OH contents in these almandine-rich garnets. Transects were acquired using a clean surface and avoiding fractures and mineral inclusions whenever possible. The values measured for each spot were then projected orthogonally on the profile line. Samples Z18TB15, Z10A and Z17TB07 show a concave behaviour: the core is more enriched in OH than the rim (Fig. 7b, d, f). For all samples a factor of 2 to 3 increase is observed from rim to core. The transect across sample Z18TB15 displays two main zones: a  $400\text{ }\mu\text{m}$  wide rim containing  $25\text{ }\mu\text{g g}^{-1}\text{ H}_2\text{O}$  and a  $200\text{ }\mu\text{m}$  core with  $50\text{ }\mu\text{g g}^{-1}\text{ H}_2\text{O}$ . Garnet Z10A shows two main optical zones in Fig. 7c. The transition from the optically brownish core (Fig. 7c, d) with  $\sim 40\text{ }\mu\text{g g}^{-1}\text{ H}_2\text{O}$  to the rim containing  $\sim 10\text{ }\mu\text{g g}^{-1}\text{ H}_2\text{O}$  is sharp. Garnet Z17TB07 (Fig. 7e, f) shows three distinct OH zones. The  $1000\text{ }\mu\text{m}$  wide core is dark (Fig. 7e) due to the high density of amphibole inclusions (note that these are filtered out when computing the OH content). The  $\text{H}_2\text{O}$  contents vary from  $100\text{ }\mu\text{g g}^{-1}\text{ H}_2\text{O}$  in the inner core to  $80\text{ }\mu\text{g g}^{-1}\text{ H}_2\text{O}$  in the outer core. The  $400\text{ }\mu\text{m}$  wide mantle zone shows  $\sim 80\text{ }\mu\text{g g}^{-1}\text{ H}_2\text{O}$  and appears optically brownish (Fig. 7e). The rim, optically lighter than the mantle, shows  $50\text{ }\mu\text{g g}^{-1}\text{ H}_2\text{O}$ , a value that is half of the inner core content. The sample Z17TB04B shows a rim that is slightly richer in OH than the mantle and **CE17** core zones. The map of sample Z17TB04B (Fig. 6c) reveals a rim ( $100\text{ }\mu\text{g g}^{-1}\text{ H}_2\text{O}$ ) 5 times richer in OH than the core ( $20\text{ }\mu\text{g g}^{-1}\text{ H}_2\text{O}$ ). Sample Z17TB03A shows a rim with already low OH contents ( $30\text{ }\mu\text{g g}^{-1}\text{ H}_2\text{O}$ ) and a core with very low OH ( $5\text{--}10\text{ }\mu\text{g g}^{-1}\text{ H}_2\text{O}$ ). The spessartine-rich garnet (sample ZTSps) displays two optical zones (Fig. 3a), a darker and a light zone, which correspond chemically to a Mn-depleted and Mn-enriched zone, respectively (Fig. 3b). Because the grain size is very small ( $10\text{--}20\text{ }\mu\text{m}$ ), the FTIR spot provides an average content of a zone of  $25 \times 25\text{ }\mu\text{m}^2$ . The  $\text{H}_2\text{O}$  content is constant at around  $100\text{ }\mu\text{g g}^{-1}\text{ H}_2\text{O}$  in the dark zone but shows a high degree of variations in the light zone in the range of  $100\text{--}500\text{ }\mu\text{g g}^{-1}\text{ H}_2\text{O}$ . Most of garnet specimens from groups 2 and 3 do not show significant variations at the grain scale. An exception is sample ZTUv that shows a thin OH-enriched rim that correlates with a change in colour and an increase in Ti contents (Fig. 6df). Both core and rim are plotting close to the 1 : 1 cation exchange for H and Ti, indicating that the  $\text{Ca}_3\text{Ti}_2\text{H}_2\text{Si}_2\text{O}_{12}$  endmember dominates in this sample. Zoning is also observed in the ZTAdr, in which garnet shows a complex oscillatory zoning (see Supplement S2).

**Table 3.** Fourier transform infrared spectroscopy results and OH content determination.

| Name     | Range of integration (cm <sup>-1</sup> ) | Total absorbance (cm <sup>-1</sup> ) |        |               | Water content (µg g <sup>-1</sup> H <sub>2</sub> O) |      |            | OH band position (cm <sup>-1</sup> )      |
|----------|------------------------------------------|--------------------------------------|--------|---------------|-----------------------------------------------------|------|------------|-------------------------------------------|
|          |                                          | Min                                  | Max    | Mean (SD)     | Min                                                 | Max  | Mean (SD)  |                                           |
| Z17TB04B | [3450–3660]                              | 27                                   | 162    | 98 (48)       | 18                                                  | 105  | 64 (24)    | <b>3553</b>                               |
| Z17TB07  | [3450–3625]                              | 50                                   | 124    | 96 (20)       | 34                                                  | 86   | 66 (14)    | <b>3551</b>                               |
| Z10A     | [3450–3625]                              | 3                                    | 81     | 34 (23)       | 2                                                   | 55   | 23 (16)    | 3500– <b>3546</b> –3631                   |
| Z18TB15  | [3450–3650]                              | 3                                    | 127    | 45 (29)       | 2                                                   | 86   | 31 (20)    | <b>3551</b>                               |
| Z17TB03A | [3450–3625]                              | 2.95 <b>TS10</b>                     | 39     | 15 (13)       | 2                                                   | 27   | 10 (9)     | <b>3554</b>                               |
| ZTSps    | [3450–3670]                              | 81                                   | 840    | 271 (185)     | 53                                                  | 554  | 179 (122)  | 3500– <b>3554</b> –3560–3591– <b>3640</b> |
| ZTRod    | [3500–3675]                              | 505                                  | 1541   | 1032 (163)    | 172                                                 | 524  | 351 (55)   | 3560–3583–3597– <b>3611–3623</b> –3656    |
| B7419    | [3500–3675]                              | 4743                                 | 6714   | 5421 (574)    | 1613                                                | 2283 | 1843 (195) | 3556–3583– <b>3598–3611</b> –3657         |
| ZTCarb   | [3500–3675]                              | 2010                                 | 5817   | 3864 (759)    | 683                                                 | 1978 | 1314 (258) | 3556– <b>3596–3611</b> –3657              |
| 35046    | [3500–3675]                              | 3154                                 | 6940   | 4730 (1105)   | 1072                                                | 2360 | 1608 (376) | 3546– <b>3617</b>                         |
| B7415    | [3500–3640]                              | 1197                                 | 2309   | 1685 (370)    | 383                                                 | 739  | 539 (118)  | <b>3564</b> –3606                         |
| A4544    | [3500–3640]                              | 1343                                 | 1566   | 1416 (70)     | 443                                                 | 517  | 467 (23)   | <b>3566</b> –3604                         |
| ZTUv     | [3450–3675]                              | 6302                                 | 10605  | 7296 (737)    | 2080                                                | 3500 | 2408 (243) | <b>3565–3578</b> –3605                    |
| ZTAdr    | [3450–3675]                              | 3183                                 | 15 356 | 7546 (2206)   | 1050                                                | 5067 | 2490 (728) | <b>3561</b> –3580– <b>3607</b> –3637      |
| B2090    | [3450–3675]                              | 12 291                               | 18 352 | 15 620 (1887) | 3933                                                | 5873 | 4998 (604) | <b>3557–3600</b> –3637                    |

SD is standard deviation. The numbers in bold are the main OH band positions.

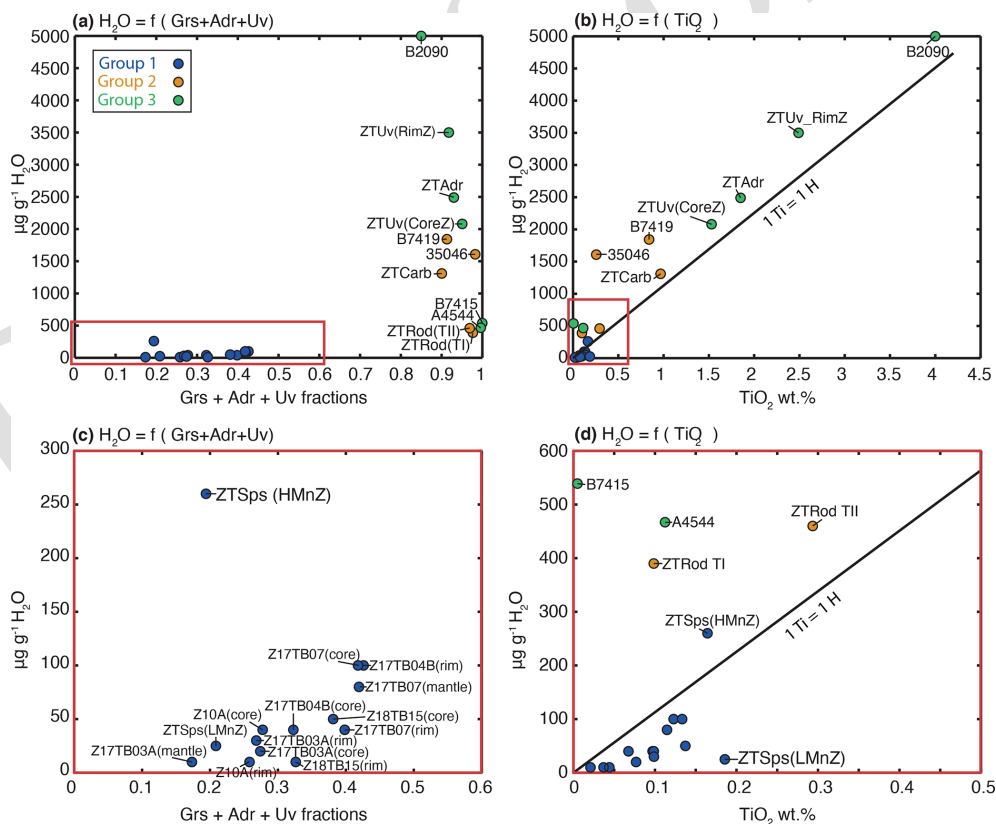

**Figure 5.** Compositional plots comparing OH contents and Ca–Ti contents in garnet. **(a)**  $\text{H}_2\text{O}$  content in garnet ( $\mu\text{g g}^{-1} \text{H}_2\text{O}$ ) as a function of the sum of the Ca–garnet endmember fractions ( $X_{\text{Grs}} + X_{\text{Adr}} + X_{\text{Uv}}$ ). Colour code follows the garnet groups as identified in Fig. 1. **(b)** OH content in garnet as a function of  $\text{TiO}_2$  (unit wt %). The black line corresponds to the 1 : 1 molar proportion for H and Ti. Colour code is identical to **(a)**. Panels **(c)** and **(d)** are, respectively, zooms of the red boxes represented on graphs **(a)** and **(b)**.

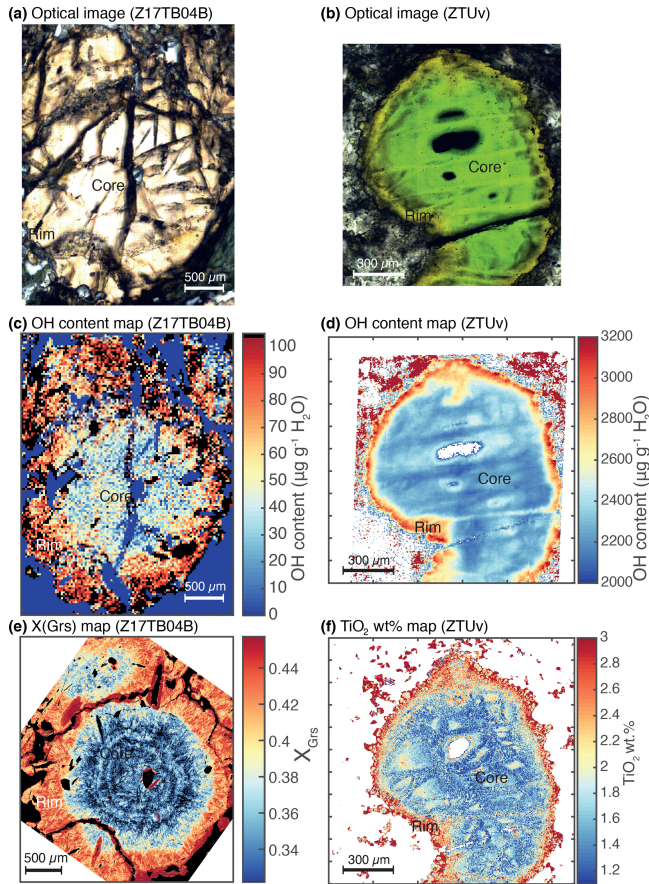

**Figure 6.** H<sub>2</sub>O concentration map and selected X-ray map obtained on two garnet grains. (a) Optical image of a grain from sample Z17TB04B. (b) Optical image of a grain from sample ZTUv. (c) FTIR transmission map of H<sub>2</sub>O content in garnet for the garnet grain from sample Z17TB04B. (d) Same as (c) but for sample ZTUv. (e) Compositional map (proportion of grossular endmember) for the selected grain of sample Z17TB04B. (f) Compositional map of TiO<sub>2</sub> of a ZTUv garnet grain.

## 5 Discussion

Garnets from all different rock types of the high-pressure area of the ZS including the rocks from the associated TGU were investigated, resulting in a wide diversity of garnet compositions and OH spectra. First, we discuss the relationships between garnet composition and the position of characteristic OH bands. The second part of the discussion is focused on the retention of OH under high-pressure and high-temperature ( $T$ ) conditions. The effects of hydrogen diffusion processes over long timescales are also discussed comparing OH zoning patterns in garnet and H diffusion models. Finally, the contribution of garnet to the deep water cycle is quantified for the case of the Zermatt area.

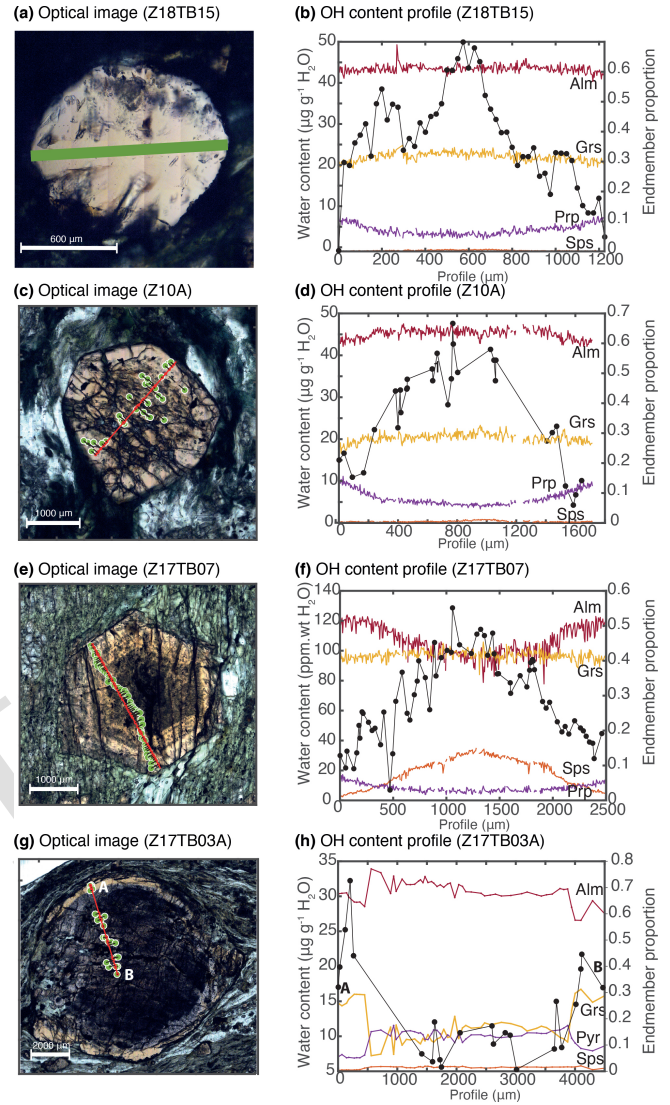

**Figure 7.** H<sub>2</sub>O content profile and corresponding endmember proportion transects ( $X_{\text{Alm}}$ ,  $X_{\text{Grs}}$ ,  $X_{\text{Pyr}}$ ,  $X_{\text{Sps}}$ ) measured across single garnet grains. Spot positions are indicated by green dots and correspond to 25–50  $\mu\text{m}$  spots. The red line corresponds to the linear regression of the spot position, on which spots are orthogonally projected to produce the adjusted profiles. This red line corresponds also to the compositional transect measured by EPMA. (a) Position on optical image of the transect acquired on a grain of sample Z18TB15. (b) Profile acquired with a step size of 25  $\mu\text{m}$  and a spot size of 25  $\mu\text{m}$  and endmember proportion profile extracted from a map (Fig. 2). Optical images (c, e, g) and adjusted profiles (d, f, h) of the grains analysed for samples Z10A, Z17TB07B and Z17TB03A. All OH profiles are expressed as micrograms per gram H<sub>2</sub>O, and compositional transects reflect molar endmember proportions.

## 5.1 Influence of composition on OH band position

As the samples experienced similar  $P$ – $T$  conditions, with the possible exception of the garnet core of Z17TB03A, and garnet grew in a fluid-saturated environment (Reynes et al., 2020), the OH spectra and EPMA data can be used to study the effect of composition on the OH incorporation capacity and on the characterisation of OH defects in the garnet structure.

### 5.1.1 The influence of composition on garnet OH content

The garnet collection from the Zermatt-Saas area represents a great variety of compositions with various origins ranging from ultramafic rocks and mafic rocks (eclogites-CE18 and garnet–diopside-rich rocks or mafic fels) to metasediments. Garnet group 3 ( $\text{Ca}^{2+}\text{Fe}^{3+}$  rich garnet specimens) contains the highest water content with up to  $6000\ \mu\text{g g}^{-1}\ \text{H}_2\text{O}$  (Table 3), followed by group 2 ( $\text{Ca}^{2+}\text{Al}^{3+}$ ) with values up to  $1800\ \mu\text{g g}^{-1}\ \text{H}_2\text{O}$ . Garnet from group 1 (mostly composed of  $\text{Fe}^{2+}\text{Al}^{3+}$  garnet) contain fewer OH groups by 1 order of magnitude with values  $< 120\ \mu\text{g g}^{-1}\ \text{H}_2\text{O}$ . In group 1, spessartine-rich garnet contains the highest  $\text{H}_2\text{O}$  content. There is an evident correlation between the Mn content of garnet in the spessartine nodule and the OH content (Fig. 3). In sample Z17TB07 the  $\text{H}_2\text{O}$  concentration profile follows the Mn zoning of the garnet (Fig. 7f). There is also a good correlation between  $\text{H}_2\text{O}$  and Ca contents in group 1 garnets. This result is supported by previous studies where Ca-rich garnet can contain up to several weight percent of  $\text{H}_2\text{O}$  (Amthauer and Rossman, 1998; Rossman and Aines, 1991), whereas pyrope–almandine garnets show at maximum a couple hundred micrograms per gram  $\text{H}_2\text{O}$  (Aines and Rossman, 1984). The grossular component in almandine garnet seems to enhance the capability of incorporating OH groups. Transects presented in Fig. 7 combined with their grossular content profile reveal that Ca-enriched zones are also enriched in  $\text{H}_2\text{O}$ . The same is observed with the maps of sample Z17TB04B. This trend is confirmed in Fig. 5 showing that for most analyses of group 1 the grossular content and the  $\text{H}_2\text{O}$  content are correlated.

For group 3, garnet grains from samples A4544 and B7415 show a water content of  $500\ \mu\text{g g}^{-1}\ \text{H}_2\text{O}$ , whereas the other samples for this group, ZTUv, ZTAdr and B2090, contain 4 to 10 times higher  $\text{H}_2\text{O}$  contents. Another anomaly appears in group 2 with sample ZTRod ( $350\ \mu\text{g g}^{-1}\ \text{H}_2\text{O}$ ) having 3 to 4 times less  $\text{H}_2\text{O}$  than samples ZTCarb and B7419. Figure 5b and d reveal a strong correlation between Ti content and  $\text{H}_2\text{O}$  incorporation in analysed garnets. Ti is known to control the OH incorporation in Ca-rich garnet (Reynes et al., 2018). The general sequence of decreasing  $\text{H}_2\text{O}$  contents is Ti-rich andradite > Ti-rich grossular > grossular > andradite > spessartine > Ca-rich almandine > pyrope–almandine. This sequence coincides

roughly with a decreasing unit-cell volume of garnet. Therefore, it is suggested that larger unit cells favour OH incorporation into garnet.

### 5.1.2 Interpretation of IR-band position for andradite-rich garnet of group 3

In garnet group 3, samples A4544 and B7415 show a very similar water content and spectrum shape (Fig. 4b). Their spectra only contain two bands, a main one at  $3564$ – $3566\ \text{cm}^{-1}$  and a secondary one at  $3604$ – $3606\ \text{cm}^{-1}$ . The main band is characteristic of OH in andradite garnet (Amthauer and Rossman, 1998) and was assigned to an isolated hydrogarnet substitution in andradite by Geiger and Rossman (2020a, b). This band is common to analyses from group 3 (highlighted by a green area in Fig. 4b) and the compositions of these garnets differ significantly, where sample B7415 is  $\text{Adr}_{95}\text{Grs}_5$  and sample A4544 is  $\text{Adr}_{75}\text{Uv}_{22}\text{Grs}_3$ . This leads to two hypotheses: either  $\text{Cr}^{3+}$  has an effect very similar to  $\text{Fe}^{3+}$  on water incorporation or the OH groups are not in an environment with neighbouring  $\text{Cr}^{3+}$ . As there is a minor shift in the band position of about  $2\ \text{cm}^{-1}$  that is negligible considering the difference in ionic radii of both  $\text{Cr}^{3+}$  ( $0.615\ \text{\AA}$ ) and  $\text{Fe}^{3+}$  ( $0.645\ \text{\AA}$ ), the second hypothesis is preferred.

The group 3 samples ZTUv, ZTAdr and B2090 have 4 to 10 times higher  $\text{H}_2\text{O}$  contents than group 1. The two main bands of samples A4544 and B7415, around  $3560$  and  $3600\ \text{cm}^{-1}$ , are still present. The positions are not the same: the first band is at  $3557\ \text{cm}^{-1}$  for sample B2090,  $3561\ \text{cm}^{-1}$  for ZTAdr and  $3565\ \text{cm}^{-1}$  for ZTUv, while the second band position is at  $3600$ ,  $3607$  and  $3605\ \text{cm}^{-1}$ . Interestingly the second band is roughly at the same intensity as the first for samples ZTAdr and B2090. Additional bands are also present, such as a band at around  $3576$ – $3580\ \text{cm}^{-1}$  clearly identified on samples ZTU, ZTAdr and B2090 (highlighted by a red area in Fig. 4b). This band is not assigned to a specific point defect yet but is usually found in Ti-bearing andradites (Amthauer and Rossman, 1998; Armbruster et al., 1998; Geiger and Rossman, 2020b; Reynes et al., 2020). This band was identified as a major band of the Ti-bearing andradite in Reynes et al. (2020a), and its intensity appears to be strongly correlated with the amount of Ti. The band near  $3563\ \text{cm}^{-1}$  also correlates with Ti. The three samples ZTUv, ZTAdr and B2090 show an  $\text{H}_2\text{O}$  content correlated with the amount of Ti (Fig. 5b) and a similar doublet at  $3560$ – $3580\ \text{cm}^{-1}$ . Sample ZTUv even shows an  $\text{H}_2\text{O}$ -rich rim corresponding to a zone enriched in Ti (Fig. 5d, f). It can be suggested that this doublet corresponds to a special cluster of two hydrogen atoms in a silicon vacancy, charge balanced with two  $\text{Ti}^{4+}$  in close neighbouring octahedral sites (substitution  $2\text{Al}^{3+} + \text{Si}^{4+} = 2\text{Ti}^{4+} + 2\text{H}^+$ ,  $[\text{Ti}_2\text{H}_2]$  defect; see Reynes et al., 2020a). This interpretation requires the occurrence of coexisting point defects with  $2\text{H}$  and  $4\text{H}$  on a Si vacancy. Previous results for grossular (Cho and

Rossmann, 1993) using solid-state nuclear magnetic resonance showed that some crystals have 2H and 4H clusters which support this interpretation. The second main band at around  $3600\text{ cm}^{-1}$  and the minor bands at  $3620\text{ cm}^{-1}$  (sample ZTUv) and  $3640\text{ cm}^{-1}$  (samples ZTUv, ZTAdr, B2090) may be attributed to silicon vacancies in grossular in different environments at the atomic scale (see below).

### 5.1.3 Interpretation of IR-band position for grossular-rich garnet of group 2

In group 2, garnet compositions are dominated by grossular with minor andradite, almandine or uvarovite components. The OH region of the spectrum can be divided into three domains: the main band at  $3600\text{--}3623\text{ cm}^{-1}$  (highlighted by an orange area in Fig. 4b), the high-wavenumber band at  $3657\text{ cm}^{-1}$  (yellow area in Fig. 4b), and the low-wavenumber broad band at  $3550\text{--}3565\text{ cm}^{-1}$  similar to the highlighted green area for andradite (Fig. 4b). The main band at around  $3611\text{ cm}^{-1}$  is characteristic of grossular (Rossmann and Aines, 1991) and is attributed to a cluster containing two  $\text{O}_4\text{H}_4$  in hydrogrossular by Geiger and Rossmann (2020a). The exception is for some spectra of sample ZTRod type I showing a prominent  $3621\text{ cm}^{-1}$  band attributed by the same authors to three  $\text{O}_4\text{H}_4$  clusters. Samples ZTRod type II, ZTCarb and B7419 all show two other bands at  $3597\text{--}3598$  and  $3583\text{ cm}^{-1}$ . The first band is characteristic of grossular and is attributed to an isolated hydrogarnet substitution in a grossular local environment (Geiger and Rossmann, 2020a). The second band at  $3583\text{ cm}^{-1}$  is linked to the presence of Ti in these garnets (see above). The EPMA analyses reveal that these specimens contain some minor amount of Ti (0.97 wt %  $\text{TiO}_2$  for sample ZTCarb, 0.84 wt %  $\text{TiO}_2$  for B7419, 0.29 wt %  $\text{TiO}_2$  for ZTRod). This  $3583\text{ cm}^{-1}$  band is prominent in the case of samples B7419 and ZTCarb compared to ZTRod. B7419 and ZTCarb contain about twice the amount of  $\text{TiO}_2$  present in ZTRod.

Garnet 35046 has a composition of  $\text{Grs}_{41}\text{Adr}_{26}\text{Uv}_{31}$ , and therefore the IR bands could be interpreted as resulting from the contribution of different environments. The spectrum of sample 35046 (Fig. 4b) presents two domains: a broad band centred at around  $3550\text{--}3560\text{ cm}^{-1}$  and an asymmetric band at  $3617\text{ cm}^{-1}$  with a shoulder at around  $3600\text{ cm}^{-1}$ . The broad band contributes to around 33 % of the total absorbance and the asymmetric band of 66 %. Following the possible band assignment proposed above, the broad band might be attributed to isolated hydrogarnet substitution in an andradite environment, while the asymmetric band is assigned to two different clusters of interconnected hydrogarnet substitution in grossular.

The high-wavenumber band at  $3657\text{ cm}^{-1}$  is characteristic of natural and synthetic hydrogrossular (Rossmann and Aines, 1991), and due to its proximity to a katoite OH band at  $3660\text{ cm}^{-1}$  (Geiger and Rossmann, 2020a; Rossmann and Aines, 1991), it has been proposed to be assigned to

a “katoite-like” cluster consisting of six interconnected hydrogarnet substitutions (Geiger and Rossmann, 2020a). However, the interpretation of these high-wavenumber bands remains controversial. These bands might represent multiple  $\text{O}_4\text{H}_4$  clusters or alternatively might also be related to F–H exchange as highlighted by Mosenfelder et al. (2022).

### 5.1.4 Interpretation of IR-band position for almandine-rich garnet of group 1

The band assignment for this group is a bit more uncertain as IR bands are smaller and broader and not well defined (Fig. 4a). For this analysis, the case of sample ZTSps is excluded and will therefore be discussed in a separate section below. The analyses of group 1 present a broad band of absorption between  $3460$  and  $3650\text{ cm}^{-1}$  (Fig. 4a). For all samples of this group, a prominent band is observed at  $3550\text{--}3555\text{ cm}^{-1}$  (blue area in Fig. 4a) and is interpreted as being related to hydrogarnet substitution in almandine garnet (Aines and Rossmann, 1984). This feature is observed for all analyses of this group. A large band appears at  $3500\text{ cm}^{-1}$  only for a few spectra (samples Z10A core, Z17TB03A rim and Z17TB07 core). The presence of this band is correlated with Ca-enriched zones but does not show any absorption in bands related to grossular at  $3600\text{ cm}^{-1}$ . Absorption in this domain ( $3500\text{ cm}^{-1}$ ) was reported for almandine garnet (Aines and Rossmann, 1984), but this feature is not assigned to any specific point defect yet. For some garnet zones, the absorption in the range of  $3600\text{--}3650\text{ cm}^{-1}$  is even higher than for the almandine band ( $3550\text{ cm}^{-1}$ ). These garnet specimens have high Ca contents that enhance the OH incorporation in almandine garnet (Fig. 5c).

### 5.1.5 Interpretation of IR-band position for almandine–spessartine solid solution (sample ZTSps)

The case of ZTSps is particular because garnet in this sample is dominated by spessartine ( $\text{Sps}_{48\text{--}55}$ , Table 2). Spessartine-rich garnet is known among pyroclastic rocks as being able to incorporate larger amount of OH (Aines and Rossmann, 1984; Arredondo et al., 2001). The garnet specimens analysed here come from a manganese nodule, and the grain size is 1 order of magnitude smaller in comparison to other specimens ( $15\text{--}60\text{ }\mu\text{m}$  in diameter). The optical image (Fig. 3a) and the EPMA map of MnO (Fig. 3b) reveal two different zones: a dark zone composed of a  $10\text{--}15\text{ }\mu\text{m}$  garnet grain with an enrichment in the almandine component ( $\text{Alm}_{22}$ ) and a depletion in the spessartine component ( $\text{Sps}_{48}$ ) compared to a light zone ( $\text{Sps}_{55}\text{Alm}_{18}$ ). The light zone contains bigger grains, on average around  $50\text{--}60\text{ }\mu\text{m}$ . As observed on the EPMA map (Fig. 3b) the single grains appear to be zoned. In the low-Mn zone, a single band is measured centred at  $3554\text{ cm}^{-1}$ . This band is either attributed to hydrogarnet substitution in an almandine environment or a small andradite component

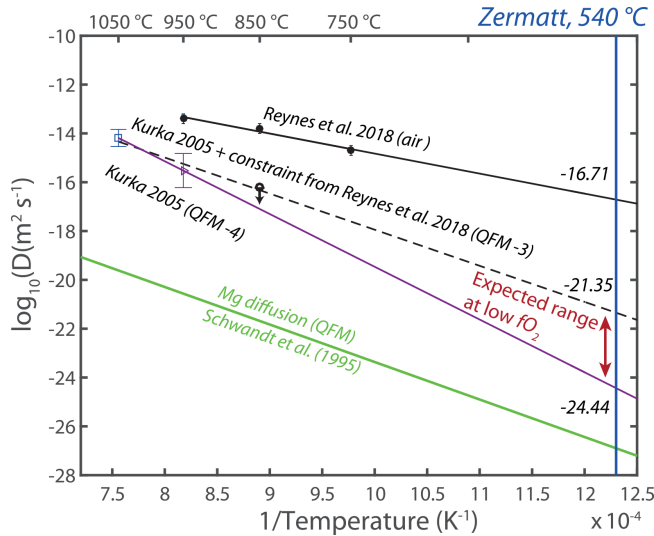

**Figure 8.** Arrhenius plot representing hydrogen diffusion rates in grossular from the studies of Kurka (2005) and Reynes et al. (2018). The diffusivities are linearly extrapolated to the determined temperature of the metamorphic peak in Zermatt: 540 °C (Angiboust et al., 2009). See text for details. The Mg cation diffusion line at QFM (CE19) plotted in green is from Schwandt et al. (1995).

(Ad<sub>9</sub>). For the high-Mn zone, the bands at higher wavenumbers increase significantly (Fig. 3c). The two new bands at 3591 and 3640  $\text{cm}^{-1}$  present higher absorption intensities (25 % higher intensity for the 3640  $\text{cm}^{-1}$  band compared to the 3560  $\text{cm}^{-1}$  band). These bands were previously identified in almandine–spessartine garnet (Aines and Rossman, 1984) with the same “wide” shape but were not clearly attributed to any point defect.

## 5.2 Retention of hydrogen in garnet under high-pressure conditions

All samples of garnet analysed in this study have an OH content from a few tens to 5000  $\mu\text{g g}^{-1}$   $\text{H}_2\text{O}$ . The widespread zoning of  $\text{H}_2\text{O}$  and garnet compositions raises two key questions: when was  $\text{H}_2\text{O}$  incorporated into garnet and how can it be preserved? Transects and maps of both major-element chemistry (EPMA) (Figs. 2, 3, 6, 7) and OH content (FTIR) (Figs. 3, 6, 7) reveal that OH zoning is intimately correlated to major and minor element zoning and can therefore be interpreted as a growth feature. Among garnet of group 1, the detailed transects exhibit two different trends. Samples Z18TB15, Z10A and Z17TB07 show a core with a higher concentration of  $\text{H}_2\text{O}$  than the rim. On the other hand, samples Z17TB04B and Z17TB03A show more  $\text{H}_2\text{O}$  in the rim than the core. Sample Z17TB03A shows very low  $\text{H}_2\text{O}$  contents in the core and an increase toward the rim. This observed variability and the complex zoning have three main implications:

1. Garnet growth in subducted rocks is generally related to dehydration reactions or to the presence of external fluids (e.g. Baxter and Caddick, 2013; Vho et al., 2020). In both cases the activity of  $\text{H}_2\text{O}$  is close to unity as an aqueous fluid is produced by the garnet-forming reaction. The amount of OH incorporated in garnet during growth seems to be rather controlled by the chemical composition of the stable garnet, which is a function of  $P$ – $T$  conditions and the reactive bulk rock composition (e.g. Lanari et al., 2017). Additionally, the water fugacity is also a function of  $P$ – $T$ , and thus complex zoning patterns are expected. As the samples shared the same  $P$ – $T$  evolution, the first-order ability for garnet to incorporate  $\text{H}_2\text{O}$  in the order Ti-rich andradite > Ti-rich grossular > grossular > andradite > spessartine > Ca-rich almandine > pyrope–almandine is related to the bulk rock system, which has a direct impact on garnet’s ability to create suitable point defects for incorporating the OH groups. This is also supported by the observation that the spectrum shape varies across the different zones (Fig. 4), which means that the OH groups are sitting in slightly different environments.
2. The OH zoning pattern produced during growth is not significantly affected by diffusion afterwards, indicating a lack of re-equilibration of H under these conditions as is also the case for the major and minor elements. Figure 8 displays a range of hydrogen diffusivity values obtained in previous studies for grossular garnet (Kurka, 2005; Reynes et al., 2018). These studies revealed that the hydrogen diffusion in air is rapid and is related to an oxidation mechanism  $\{M^{2+} + H^+\} + \frac{1}{4}\text{O}_2 = M^{3+} + \frac{1}{2}\text{H}_2\text{O}$ , whereas the diffusion rates slow down by several orders of magnitude at lower oxygen fugacity. The extrapolation of hydrogen diffusion rates in air at the temperature of  $540 \pm 20$  °C corresponding to the temperature under peak pressure conditions recorded in the Zermatt-Saas zone (Angiboust et al., 2009) gives a value of  $\log(D[\text{m}^2 \text{s}^{-1}]) = -16.7 \pm 0.26$ . Note that “ $\log(D[\text{m}^2 \text{s}^{-1}])$ ” is formally  $\log(D[\text{m}^2 \text{s}^{-1}]/1 \text{ m}^2 \text{s}^{-1})$ , as the argument of a logarithm is dimensionless. For extrapolation under low-oxygen-fugacity conditions, a range of diffusivity was computed based on two data points from Kurka (2005) with and without the low-oxygen-fugacity constraint from Reynes et al. (2018). The range of  $\log(D[\text{m}^2 \text{s}^{-1}])$  values for the temperature of the pressure peak is estimated between  $-21.4 \pm 0.46$  and  $-24.4 \pm 0.67$ . These three  $\log(D[\text{m}^2 \text{s}^{-1}])$  estimates were then used for modelling hydrogen diffusion in 2D for a representative sample of almandine-rich garnet (group 1). Sample Z17TB07 was selected as it shows very distinct zoning patterns. The starting conditions

(initial in Fig. 9) were set using sharp water zoning assumed to represent three distinct stages of garnet growth and is based on the zoning patterns observed in the chemical maps (Fig. 2b). The model simulates diffusion for a duration of 4 Myr – corresponding to the maximum estimated time spent under high-pressure conditions – using the three different diffusion rates. The model at  $\log(D[\text{m}^2 \text{s}^{-1}]) = -16.7$  shows a very fast loss of  $\text{H}_2\text{O}$  and a nearly total re-equilibration within 500 years (Fig. 9a) assuming dry boundary conditions. Experiments at  $\log(D[\text{m}^2 \text{s}^{-1}]) = -21.4$  show that the initial concentration in the core of the garnet is preserved in 4 Myr (Fig. 9b), but the intermediate zones are blurred and the boundaries no longer visible. With the lowest diffusion coefficient of  $\log(D[\text{m}^2 \text{s}^{-1}]) = -24.4$ ,  $\text{H}_2\text{O}$  zoning is fully preserved (Fig. 9c). The only observable effect is a  $\sim 50 \mu\text{m}$  wide blurring transition between the initially sharp zones. The OH zoning patterns observed in garnet from the Zermatt-Saas area suggest, based on the results of diffusion modelling, that diffusion of H was slow with  $\log(D[\text{m}^2 \text{s}^{-1}])$  values in the range of  $-21.4$  to  $-24.4$ . Due to the lack of experiments at high pressure, it is unclear if this is related to oxygen fugacity or other factors. Figure 4 reveals that the IR-band positions and intensities vary for the different garnet zoning patterns. As discussed above, it is likely that different point defects – or at least different environments at the atomic scale – co-exist in a single grain. It is suggested that these different OH groups follow different diffusion pathways. A substitution mechanism involving coupled substitution and local charge equilibration like with Ti ( $2\text{M}^{3+} + \text{Si}^{4+} = 2\text{Ti}^{4+} + 2\text{H}^+$ ) (Reynes et al., 2020) could also influence the stability of OH groups in the garnet structure.

3. The preserved OH zoning patterns also mean that  $\text{H}_2\text{O}$  contents that were acquired during prograde garnet growth are preserved. For the almandine-rich garnets the prograde cores have generally higher OH contents than the mantle and the rims indicating that increasing pressure does not necessarily lead to higher OH contents (see Sect. 5.3). The case of sample Z17TB03A is particularly interesting because the nearly dry core of this garnet is interpreted to have formed at pre-Alpine times under amphibolite-facies conditions (Bucher et al., 2019), whereas the rim containing OH formed during Alpine metamorphism at higher pressure (Bovay et al., 2022; Bucher et al., 2019). In the spessartine-rich samples, the early-formed parts highest in Mn have the highest OH contents, whereas the recrystallisation zones have lower OH contents. Finally, the ZTUV sample containing andradite-uvarovite comes from metasomatised mafic dyke in the serpentinites. The core of this garnet might have already formed during the oceanic al-

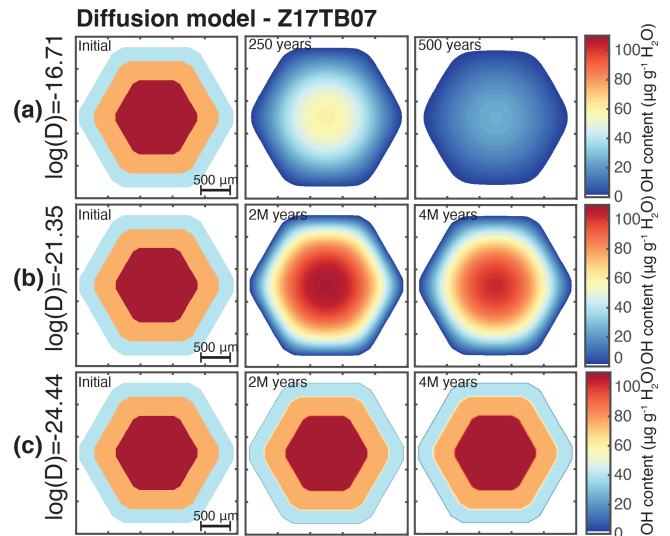

**Figure 9.** Hydrogen diffusion modelling for a grain of sample Z17TB07 at metamorphic peak temperature ( $540^\circ\text{C}$ ) for three different diffusivity values and at three different time steps. **(a)** H diffusion modelling with  $\log(D[\text{m}^2 \text{s}^{-1}]) = -16.71$  at initial stage and after 250 and 500 years. **(b)** H diffusion modelling with  $\log(D[\text{m}^2 \text{s}^{-1}]) = -21.35$  at initial stage and after 2 and 4 Myr. **(c)** Same as **(b)** but with  $\log(D[\text{m}^2 \text{s}^{-1}]) = -24.44$ .

teration, whereas the rim that is higher in Ti and OH contents is interpreted to be related to the eclogite-facies equilibration and fluid flow when the serpentinites experienced the fluid-liberating reaction of antigorite + brucite to olivine + chlorite + fluid close to peak metamorphic conditions (Kempf et al., 2020).

### 5.3 Comparison with other high-pressure garnets

The retention of hydrogen in garnet under high-pressure conditions was observed in other locations. Eclogitic garnet from the Kockchetav massif has undergone ultra-high-pressure conditions (up to 6.0 GPa,  $1000^\circ\text{C}$ ; Okamoto, 2000) and shows a gradual increase in  $\text{H}_2\text{O}$  content with the metamorphic grade:  $10\text{--}50 \mu\text{g g}^{-1} \text{H}_2\text{O}$  for quartz-bearing eclogites,  $80\text{--}120 \mu\text{g g}^{-1} \text{H}_2\text{O}$  for coesite-bearing eclogites and  $130\text{--}150 \mu\text{g g}^{-1} \text{H}_2\text{O}$  for diamond-grade eclogites (Katayama et al., 2006). Samples from the Erzgebirge massif show  $\text{H}_2\text{O}$  contents in eclogitic garnet in the range of  $43\text{--}84 \mu\text{g g}^{-1} \text{H}_2\text{O}$  and  $121\text{--}241 \mu\text{g g}^{-1} \text{H}_2\text{O}$  in garnetite (metarodinite) (Schmädicke and Gose, 2020; Gose and Schmädicke, 2018; Schmädicke and Gose, 2017). Garnet from the Lepontine Alps (Cima Di Gagnone and Alpe Arami) is the most  $\text{H}_2\text{O}$ -depleted high-pressure garnet reported with  $4\text{--}11 \mu\text{g g}^{-1} \text{H}_2\text{O}$  in eclogites and  $23\text{--}46 \mu\text{g g}^{-1} \text{H}_2\text{O}$  in garnetite (Schmädicke and Gose, 2020). Ultra-high-pressure pyrope from the Dora-Maira whiteschists contains  $10\text{--}30 \mu\text{g g}^{-1} \text{H}_2\text{O}$  (Blanchard and Ingrin, 2004a; Rossman et al., 1989). Water contents of  $14\text{--}1900 \mu\text{g g}^{-1} \text{H}_2\text{O}$  are re-

ported in eclogitic garnet from Dabie-Sulu (Chen et al., 2007; Sheng et al., 2007; Xia et al., 2005), which is an  $\text{H}_2\text{O}$  content about 3 orders of magnitude higher than in other localities. In those studies, all spectra evaluated with high  $\text{H}_2\text{O}$  contents present a broad band centred on  $3400\text{ cm}^{-1}$  (Chen et al., 2007; Sheng et al., 2007; Xia et al., 2005) that might be attributed to fluid inclusion or non-structural water (Reynes et al., 2020) or even to micro-inclusions of chlorite (Gou et al., 2020). It is therefore likely that these studies overestimated the amount of OH incorporated in garnet.

One important question regarding the variability in  $\text{H}_2\text{O}$  contents in garnet is whether the composition controlled by  $P$  and  $T$  is the main factor or whether a direct pressure effect exists in addition. The OH contents measured in eclogitic garnet in Zermatt, for example Z17TB07, with  $50\text{--}110\text{ }\mu\text{g g}^{-1}\text{ H}_2\text{O}$  appears to be slightly higher than in Kockchetav and Erzgebirge quartz–eclogite garnet. One of the hypotheses suggested for the increasing OH content in garnet with pressure is based on the increasing Ca content in garnet with pressure (Schmädicke and Gose, 2017). The peak metamorphic conditions of Zermatt are within the domain of quartz-bearing eclogites. Many Ca-bearing phases, like zoisite or amphibole, are still present in the matrix of these rocks. If such rocks were buried deeper, it is likely that these hydrous phases would eventually break down and lead to the formation of more grossular (Ca-rich) garnet. As previously discussed, it appears that the Ca component influences the H uptake of garnet (Fig. 5). This mechanism could be seen as an indirect effect of pressure on OH incorporation. On the other hand, Lu and Keppler (1997) showed experimentally that OH solubility in natural Dora-Maira pyrope at  $1000^\circ\text{C}$  increases with pressure in the range of 1.5 to 10.0 GPa. This enhanced solubility of the OH group with pressure is important when considering the subduction geotherms. In a cold subduction environment, hydrous phases like lawsonite and phengite could take  $\text{H}_2\text{O}$  down to 200 km depth (100 kbar,  $800^\circ\text{C}$ ; Schmidt and Poli, 1998) where these phases will eventually break down, likely leading to garnet with significantly higher  $\text{H}_2\text{O}$  contents. By contrast, in warm subduction settings amphibole breakdown occurs at 80 km depth (30 kbar,  $600^\circ\text{C}$ ) and the solubility of H in garnet will be lower. Based on pyrope the difference in solubility could be up to a factor of 2.5 (Lu and Keppler, 1997).

#### 5.4 Water budget for the Zermatt subducted oceanic lithosphere

In this study, the  $\text{H}_2\text{O}$  contents of garnet were determined for each of the rock types that are typical for a slice of high-pressure crust of the Zermatt-Saas area. By estimating the volume of the different units of the slice and the volume of garnet in each of them, it is possible to estimate the total amount of water stored in garnet under these quartz–eclogite-facies conditions. For the computation, a unit volume of  $2.2\text{ km} \times 1.5\text{ cm} \times 1\text{ km}$  is considered. The value of 2.2 km

corresponds to the estimated thickness of the slab, composed of 1 km ultramafic rocks, 1 km mafic rocks (eclogitic mafic fels) and 200 m of sedimentary cover. The value of 1.5 cm represents the amount of crust passing under these conditions in 1 year, based on a plate movement rate of  $1.5\text{ cm yr}^{-1}$  (Handy et al., 2010). The value of 1 km corresponds to a lateral section of slab. If the length of the subduction zone is known, then a flow (in  $\text{kg yr}^{-1}$  of  $\text{H}_2\text{O}$ ) can be determined. Results including the percentage of the different garnet-bearing rocks, their garnet volume fractions and the corresponding total amount of  $\text{H}_2\text{O}$  stored in garnet are presented in Table 4. The sedimentary layer is subdivided into four components: 33 vol % garnet schists, 33 % metacarbonates, 33 % mafic schist and 1 % spessartine nodules (Fig. 10a.). The relative volumes of garnet and the corresponding proportion of  $\text{H}_2\text{O}$  are summarised in Fig. 10b and c. Eclogitic mafic fels contain the largest volume of garnet with 82 vol % of all garnet (Fig. 10b). Garnets from metasediments are responsible for 15 vol %, roughly equilibrated between the three main rock types (mafic schists, garnet schists and metacarbonates). Rodingites and andradite veins represent less than 3 vol % of the total garnet volume, as they only sporadically occur in small boudins and dykes in the serpentinites. For garnet in the Zermatt-Saas area, the total amount of water contained in the form of structural OH groups is  $3360\text{ kg H}_2\text{O km}^{-1}\text{ yr}^{-1}$ . Considering the 1 km thick slice of serpentinites and an average of 25 % metamorphic olivine (growing after brucite–antigorite dehydration reaction) containing  $100\text{ }\mu\text{g g}^{-1}\text{ H}_2\text{O}$  (Kempf et al., 2020), the water stored in metamorphic olivine is about  $1125\text{ kg km}^{-1}\text{ yr}^{-1}$ . These calculations show that at the depth reached by the Zermatt-Saas slice ( $\sim 80\text{ km}$ ) garnet can carry 3 times more water than metamorphic olivine. The water stored in garnet and olivine can potentially be transported deeper in the Earth beyond the disappearance of both antigorite and chlorite. In terms of water partitioning between the different lithologies, it appears that eclogitic mafic fels contain 52 vol % of the total water (Fig. 10c) and the metacarbonates 42 vol %. Therefore, eclogitic mafic fels and metacarbonates play a major role in the deep water cycle, even though the  $\text{H}_2\text{O}$  content in eclogitic garnet is rather small at  $\sim 100\text{ }\mu\text{g g}^{-1}\text{ H}_2\text{O}$ . For metacarbonates, the volume is small (5 vol %), but garnet has very high water contents ( $> 1000\text{ }\mu\text{g g}^{-1}\text{ H}_2\text{O}$ ). Other sediments, like mafic schists and garnet schists, are contributing to less than 3 % due to both their small relative rock volume and the low  $\text{H}_2\text{O}$  contents in garnet ( $< 50\text{ }\mu\text{g g}^{-1}\text{ H}_2\text{O}$ ). Rodingite garnets contribute 4 % of the garnet water budget. Their relatively small rock volume associated with the high garnet water contents ( $400\text{ }\mu\text{g g}^{-1}\text{ H}_2\text{O}$ ) explains why this unit has a minor contribution of garnet to the deep water cycle. It is important to note that the garnet samples showing the highest water content (andradite or group 3 garnets with  $5000\text{ }\mu\text{g g}^{-1}\text{ H}_2\text{O}$ ) are a negligible part ( $\text{TSI} \ll 1\%$ ) of this budget due to their small relative rock volume. These calculations are restricted only to garnet and thus represent a min-

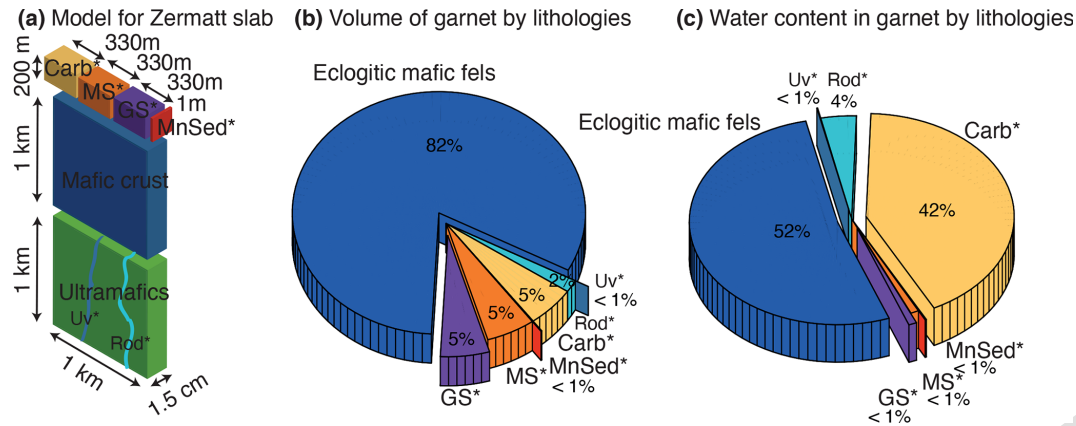

**Figure 10.** Water budget in garnet for the deeply subducted oceanic lithosphere preserved in the Zermatt area. **(a)** Model of lithology and unit partitioning in the Zermatt area. **(b)** Pie chart representing the relative volume of garnet by lithology. **(c)** Pie chart highlighting the relative water contribution of garnet from different rock units. Abbreviations: Carb\* is metacarbonates, MS\* is mafic schists, GS\* is garnet schists, MnSed\* is Mn-rich metasediments, Rod\* is rodingites and Uv\* is andradite–uvarovite veins.

**Table 4.** Parameters and quantities used for the computation of water budget in garnet of the Zermatt area.

|                               | Ultramafics |          | Mafic crust |            | Sedimentary cover |        |          |
|-------------------------------|-------------|----------|-------------|------------|-------------------|--------|----------|
|                               | Rodingite   | Uv / Adr | Mafic fels  | Grt schist | Mafic schist      | Mn Sed | MetaCarb |
| Volume Grt-bearing rock (%)   | 0.01        | 0.0001   | 100         | 33         | 33                | 1      | 33       |
| Grt proportion (%)            | 60          | 20       | 30          | 30         | 20                | 90     | 30       |
| Density (kg m <sup>-3</sup> ) | 3600        | 3800     | 3900        | 4000       | 4000              | 4070   | 3645     |
| Garnet water content (wt %)   | 0.04        | 0.24     | 0.01        | 0.0015     | 0.0025            | 0.02   | 0.13     |

Mn Sed is Mn-rich metasediments. MetaCarb is metacarbonates.

imum amount of H<sub>2</sub>O transported beyond sub-arc depth in subduction zones. Clinopyroxene is likely to contain higher H<sub>2</sub>O contents than garnet, and additional studies are needed to quantify its contribution.

## 6 Conclusions

The detailed investigation of H<sub>2</sub>O incorporation into garnet with different compositions in various eclogite-facies rocks from the Zermatt-Saas area revealed important systematics for the garnet deep water cycle at multiple scales.

- At the metre to kilometre scale, the amount of water taken up in garnet would be controlled by eclogitic garnets despite their relatively low water contents and by carbonate-rich metasediments despite their relatively small volume.
- At the microscale, OH zoning was observed within single grains. These zoning patterns reveal a strong correlation between the major-element composition and OH content. The Ca, Mn and Ti components are driving the capability of garnet to incorporate OH groups. The zoning is preserved and therefore did not signifi-

cantly re-equilibrate by diffusion after growth, suggesting very low diffusivities of hydrogen under eclogite- and blueschist-facies conditions.

- At the atomic scale, it was possible to assign different infrared bands to specific point defects. The observed bands are witnessing the local environment of the OH groups and provide information about the immediate environment of the OH groups. This study supports that in a single garnet grain, several hydrous nano-scale domains are co-existing: hydrogarnet in grossular, andradite and almandine domains and Ti<sub>2</sub>H<sub>2</sub> point defects. Some of the measured spectra show high-frequency bands (3640–3660 cm<sup>-1</sup>), for which the interpretation remains controversial (interconnected hydrogarnet substitutions or F–H defect).

**Code and data availability.** Programs and data produced in this study are available upon requests to the corresponding author.

**Supplement.** The supplement related to this article is available online at: <https://doi.org/10.5194/ejm-35-1-2023-supplement>. **TS12**

*Author contributions.* JR: conceptualisation, data curation, formal analysis, investigation, methodology, software, validation, visualisation, writing – original draft preparation, review, editing. JH: conceptualisation, funding acquisition, methodology, project administration, resources, supervision, validation, writing – original draft preparation, review, editing. PL: methodology, resources, software, writing – original draft preparation, review, editing. TB: investigations, resources, writing – original draft preparation, review, editing.

*Competing interests.* The contact author has declared that none of the authors has any competing interests.

*Disclaimer.* Publisher's note: Copernicus Publications remains neutral with regard to jurisdictional claims in published maps and institutional affiliations.

*Special issue statement.* This article is part of the special issue 15 “(Ultra)high-pressure metamorphism, from crystal to orogenic scale”. It is a result of the 14th International Eclogite Conference (IEC-14) held in Paris and Lyon, France, 10–13 July 2022. [TS13](#)

*Acknowledgements.* We would like to thank Christian Chopin and Gaston Godard for their constructive remarks and careful editorial 20 handling of the manuscript, as well as two anonymous reviewers whose comments contributed to improve this work. We are grateful to Beda Hofmann and the Natural History Museum of Bern for granting us access to the museum collections. We also thank Elias Kempf for the help with sampling in Zermatt. Comments on an 25 earlier version by [TS14](#)S. Demouchy and [TS15](#)C. Geiger and another anonymous reviewer also helped to improve the paper. This work was financially supported by the Swiss National Science Foundation grant no. 200021\_169062 to Jörg Hermann and Julien Reynes.

*Financial support.* [TS16](#)This research has been supported by 30 the Schweizerischer Nationalfonds zur Förderung der Wissenschaftlichen Forschung (grant no. 200021\_169062).

*Review statement.* This paper was edited by Christian Chopin and Gaston Godard, and reviewed by two anonymous referees.

## References

- [TS17](#) Agard, P., Monié, P., Jolivet, L., and Goffé, B.: Exhumation of the Schistes Lustrés complex: in situ laser probe  $^{40}\text{Ar}/^{39}\text{Ar}$  constraints and implications for the Western Alps, *J. Metamorph. Geol.*, 20, 599–618, <https://doi.org/10.1046/j.1525-1314.2002.00391.x>, 2002.
- Aines, R. D. and Rossman, G. R.: The hydrous component in garnets: pyrralspites, *Am. Mineral.*, 69, 1116–1126, 1984.
- Amato, J. M., Johnson, C. M., Baumgartner, L. P., and Beard, B. L.: Rapid exhumation of the Zermatt-Saas ophiolite deduced from high-precision SmNd and RbSr geochronology, *Earth Planet. Sc. Lett.*, 171, 425–438, [https://doi.org/10.1016/S0012-821X\(99\)00161-2](https://doi.org/10.1016/S0012-821X(99)00161-2), 1999.
- Amthauer, G. and Rossman, G. R.: The hydrous component in andradite garnet, *Am. Mineral.*, 83, 835–840, <https://doi.org/10.2138/am-1998-7-815>, 1998.
- Andrut, M., Wildner, M., and Beran, A.: The crystal chemistry of birefringent natural uvarovites, Part IV. OH defect incorporation mechanisms in non-cubic garnets derived from polarized IR spectroscopy, *Eur. J. Mineral.*, 14, 1019–1026, <https://doi.org/10.1127/0935-1221/2002/0014-1019>, 2002.
- Angiboust, S., Agard, P., Jolivet, L., and Beyssac, O.: The Zermatt-Saas ophiolite: the largest (60-km wide) and deepest (c. 70–80 km) continuous slice of oceanic lithosphere detached from a subduction zone?, *Terra Nova*, 21, 171–180, <https://doi.org/10.1111/j.1365-3121.2009.00870.x>, 2009.
- Armbruster, T., Birrer, J., Libowitzky, E., and Beran, A.: Crystal chemistry of Ti-bearing andradites, *Eur. J. Mineral.*, [TS18](#) 907–922, <https://doi.org/10.1127/ejm/10/5/0907>, 1998.
- Arredondo, E. H., Rossman, G. R., and Lumpkin, G. R.: Hydrogen in spessartine-almandine garnets as a tracer of granitic pegmatite evolution, *Am. Mineral.*, 86, 485–490, <https://doi.org/10.2138/am-2001-0412>, 2001.
- Basso, R., Cimmino, F., and Messiga, B.: Crystal-chemistry of hydrogarnets from 3 different microstructural sites of a basaltic metarodingite from the Voltri-massif (Western Liguria, Italy), *Neues Jahrb. Mineral.-Abh.*, 148, 246–258, 1984.
- Baxter, E. F. and Caddick, M. J.: Garnet growth as a proxy for progressive subduction zone dehydration, *Geology*, 41, 643–646, <https://doi.org/10.1130/G34004.1>, 2013.
- Bearth, P.: Die Ophiolithe der Zone von Zermatt-Saas Fee, Kümmerly and Frey Bern, [TS19](#) 1967.
- Bell, D. R., Ihinger, P. D., and Rossman, G. R.: Quantitative analysis of trace OH in garnet and pyroxenes, *Am. Mineral.*, 80, 465–474, <https://doi.org/10.2138/am-1995-5-607>, 1995.
- Blanchard, M. and Ingrin, J.: Hydrogen diffusion in Dora Maira pyrope, *Phys. Chem. Miner.*, 31, 593–605, <https://doi.org/10.1007/s00269-004-0421-z>, 2004a.
- Blanchard, M. and Ingrin, J.: Kinetics of deuteration in pyrope, *Eur. J. Mineral.*, 16, 567–576, <https://doi.org/10.1127/0935-1221/2004/0016-0567>, 2004b.
- Bovay, T., Rubatto, D., and Lanari, P.: Pervasive fluid-rock interaction in subducted oceanic crust revealed by oxygen isotope zoning in garnet, *Contrib. Mineral. Petrol.*, 176, 55–[TS20](#), <https://doi.org/10.1007/s00410-021-01806-4>, 2021.
- Bovay, T., Lanari, P., Rubatto, D., Smit, M., and Piccoli, F.: Pressure–temperature–time evolution of subducted crust revealed by complex garnet zoning (Theodul Glacier Unit, Switzerland), *J. Metamorph. Geol.*, 40, 175–206, <https://doi.org/10.1111/jmg.12623>, 2022.
- Bowtell, S. A., Cliff, R. A., and Barnicoat, A. C.: Sm–Nd isotopic evidence on the age of eclogitization in the Zermatt-Saas ophiolite, *J. Metamorph. Geol.*, 12, 187–196, <https://doi.org/10.1111/j.1525-1314.1994.tb00013.x>, 1994.
- Bucher, K., Fazis, Y., De Capitani, C., and Grapes, R.: Blueschists, eclogites, and decompression assemblages of the Zermatt-Saas 100

- ophiolite: High-pressure metamorphism of subducted Tethys lithosphere, *Am. Mineral.*, 90, 821–835, 2005.
- Bucher, K., Weisenberger, T. B., Klemm, O., and Weber, S.: Decoding the complex internal chemical structure of garnet porphyroblasts from the Zermatt area, Western Alps, *J. Metamorph. Geol.*, 37, 1151–1169, <https://doi.org/10.1111/jmg.12506>, 2019.
- Chen, R.-X., Zheng, Y.-F., Gong, B., Zhao, Z.-F., Gao, T.-S., Chen, B., and Wu, Y.-B.: Origin of retrograde fluid in ultrahigh-pressure metamorphic rocks: Constraints from mineral hydrogen isotope and water content changes in eclogite–gneiss transitions in the Sulu orogen, *Geochim. Cosmochim. Ac.*, 71, 2299–2325, <https://doi.org/10.1016/j.gca.2007.02.012>, 2007.
- Chinner, G. A. and Dixon, J. E.: Some High-pressure Parageneses of the Allalin Gabbro, Valais, Switzerland, *J. Petrol.*, 14, 185–202, <https://doi.org/10.1093/petrology/14.2.185>, 1973.
- Cho, H. and Rossman, G. R.: Single-crystal NMR studies of low-concentration hydrous species in minerals: Grossular garnet, *Am. Mineral.*, 78, 1149–1164, 1993.
- Cohen-Addad, C., Ducros, P., and Bertaut, E. F.: Etude de la Substitution du groupement  $\text{SiO}_4$  par  $(\text{OH})_4$  dans les composés  $\text{Al}_2\text{Ca}_3(\text{OH})_{12}$  et  $\text{Al}_2\text{Ca}_3(\text{SiO}_4)_2 \cdot 16(\text{OH}) \cdot 3.36$  de type grenat, *Acta Crystallogr.*, 23, 220–230, 1967.
- Crank, J.: *The Mathematics of diffusion*, Clarendon Press – Oxford, 1975.
- Foreman, D. W.: Neutron and X-Ray Diffraction Study of  $\text{Ca}_3\text{Al}_2(\text{O}_4\text{D}_4)_3$ , a Garnetoid, *J. Chem. Phys.*, 48, 3037–3041, <https://doi.org/10.1063/1.1669569>, 1968.
- Freeze, R. A. and Cherry, J. A.: *Groundwater*, Prentice-Hall, Englewood Cliffs, N.J., 604 pp., 1979.
- Geiger, C. A. and Rossman, G. R.: Micro- and nano-size hydrogarnet clusters and proton ordering in calcium silicate garnet: Part I. The quest to understand the nature of “water” in garnet continues, *Am. Mineral.*, 105, 455–467, <https://doi.org/10.2138/am-2020-7256>, 2020a.
- Geiger, C. A. and Rossman, G. R.: Micro- and nano-size hydrogarnet clusters in calcium silicate garnet: Part II. Mineralogical, petrological, and geochemical aspects, *Am. Mineral.*, 105, 468–478, <https://doi.org/10.2138/am-2020-7257>, 2020b.
- Geiger, C. A., Langer, K., Bell, D. R., Rossman, G. R., and Winkler, B.: The hydroxide component in synthetic pyrope, *Am. Mineral.*, 76, 49–59, 1991.
- Gose, J. and Schmädicke, E.: Water Incorporation in Garnet: Coesite versus Quartz Eclogite from Erzgebirge and Fichtelgebirge, *J. Petrol.*, 59, 207–232, <https://doi.org/10.1093/petrology/egy022>, 2018.
- Gou, Y., Wang, Q., Li, Y., and Wirth, R.: Water Content in Garnet from Eclogites: Implications for Water Cycle in Subduction Channels, *Minerals*, 10, 410, <https://doi.org/10.3390/min10050410>, 2020.
- Handy, M. R., M. Schmid, S., Bousquet, R., Kissling, E., and Bernoulli, D.: Reconciling plate-tectonic reconstructions of Alpine Tethys with the geological–geophysical record of spreading and subduction in the Alps, *Earth-Sci. Rev.*, 102, 121–158, <https://doi.org/10.1016/j.earscirev.2010.06.002>, 2010.
- Katayama, I., Nakashima, S., and Yurimoto, H.: Water content in natural eclogite and implication for water transport into the deep upper mantle, *Lithos*, 86, 245–259, 2006.
- Kempf, E. D., Hermann, J., Reusser, E., Baumgartner, L. P., and Lanari, P.: The role of the antigorite + brucite to olivine reaction in subducted serpentinites (Zermatt, Switzerland), *Swiss J. Geosci.*, 113, 16, <https://doi.org/10.1186/s00015-020-00368-0>, 2020.
- Khomenko, V. M., Langer, K., Beran, A., Koch-Müller, M., and Fehr, T.: Titanium substitution and OH-bearing defects in hydrothermally grown pyrope crystals, *Phys. Chem. Miner.*, 20, 483–488, <https://doi.org/10.1007/BF00203218>, 1994.
- Kühberger, A., Fehr, T., Huckenholz, H. G., and Amthauer, G.: Crystal chemistry of a natural schorlomite and Ti-andradites synthesized at different oxygen fugacities, *Phys. Chem. Miner.*, 16, 734–740, <https://doi.org/10.1007/BF00209694>, 1989.
- Kurka, A.: Hydrogen in Ca-rich garnets: diffusion and stability of OH-defects, Toulouse III Paul Sabatier, Toulouse, France, 371 pp., 2005.
- Kurka, A., Blanchard, M., and Ingrin, J.: Kinetics of hydrogen extraction and deuteration in grossular, *Mineral. Mag.*, 69, 359–371, <https://doi.org/10.1180/0026461056930257>, 2005.
- Lager, G. A., Armbruster, T., and Faber, J.: Neutron and X-ray diffraction study of hydrogarnet  $\text{Ca}_3\text{Al}_2(\text{O}_4\text{H}_4)_3$ , *Am. Mineral.*, 72, 756–765, 1987.
- Lanari, P., Vidal, O., De Andrade, V., Dubacq, B., Lewin, E., Grosch, E. G., and Schwartz, S.: XMapTools: A MATLAB® – based program for electron microprobe X-ray image processing and geothermobarometry, *Comput. Geosci.*, 62, 227–240, <https://doi.org/10.1016/j.cageo.2013.08.010>, 2014.
- Lanari, P., Giuntoli, F., Loury, C., Burn, M., and Engi, M.: An inverse modeling approach to obtain  $P$ – $T$  conditions of metamorphic stages involving garnet growth and resorption, *Eur. J. Mineral.*, 29, 181–199, <https://doi.org/10.1127/ejm/2017/0029-2597>, 2017.
- Lanari, P., Vho, A., Bovay, T., Airaghi, L., and Centrella, S.: Quantitative compositional mapping of mineral phases by electron probe micro-analyser, in: *Metamorphic Geology: Microscale to Mountain Belts*, Vol. 478, edited by: Ferrero, S., P. L., Geological Society of London, Special Publications, 2019.
- Lemoine, M., Bas, T., Arnaud-Vanneau, A., Arnaud, H., Dumont, T., Gidon, M., Bourbon, M., de Graciansky, P.-C., Rudkiewicz, J.-L., Megard-Galli, J., and Tricart, P.: The continental margin of the Mesozoic Tethys in the Western Alps, *Mar. Pet. Geol.*, 3, 179–199, [https://doi.org/10.1016/0264-8172\(86\)90044-9](https://doi.org/10.1016/0264-8172(86)90044-9), 1986.
- Li, X.-P., Rahn, M., and Bucher, K.: Serpentinites of the Zermatt-Saas ophiolite complex and their texture evolution, *J. Metamorph. Geol.*, 22, 159–177, <https://doi.org/10.1111/j.1525-1314.2004.00503.x>, 2004.
- Lu, R. and Keppler, H.: Water solubility in pyrope to 100 kbar, *Contrib. Mineral. Petrol.*, 129, 35–42, <https://doi.org/10.1007/s004100050321>, 1997.
- Luoni, P., Rebay, G., Spalla, M. I., and Zanoni, D.: UHP Ti-chondrodite in the Zermatt-Saas serpentinite: Constraints on a new tectonic scenario, *Am. Mineral.*, 103, 1002–1005, <https://doi.org/10.2138/am-2018-6460>, 2018.
- Maldener, J., Hösch, A., Langer, K., and Rauch, F.: Hydrogen in some natural garnets studied by nuclear reaction analysis and vibrational spectroscopy, *Phys. Chem. Miner.*, 30, 337–344, <https://doi.org/10.1007/s00269-003-0321-7>, 2003.
- Martin, S., Rebay, G., Kienast, J.-R., and Mével, C.: An eclogitised oceanic palaeo-hydrothermal field from the St. Marcel Valley (Italian Western Alps), *Ophioliti*, 33, 49–63, 2008.

- Mosenfelder, J. L., von der Handt, A., Withers, A. C., Bureau, H., Raepsaet, C., and Rossman, G. R.: Coupled hydrogen and fluorine incorporation in garnet: New constraints from FTIR, ERDA, SIMS, and EPMA, *Am. Mineral.*, 107, 587–602, <https://doi.org/10.2138/am-2021-7880>, 2022.
- Nace, R. L.: Scientific framework of world water balance, UNESCO, [TS31](https://doi.org/10.2138/am-2021-7880) 1971.
- Okamoto, K. L.: Petrological study of the diamond grade eclogite in the Kokchetav massif, northern Kazakhstan, *Isl. Arc*, 9, 379–399, 2000.
- Peacock, S. M.: Fluid Processes in subduction Zones, *Science*, 248, [TS32](https://doi.org/10.2138/am-2021-7880) 1990.
- Rebay, G., Zanon, D., Langone, A., Luoni, P., Tiepolo, M., and Spalla, M. I.: Dating of ultramafic rocks from the Western Alps ophiolites discloses Late Cretaceous subduction ages in the Zermatt-Saas Zone, *Geol. Mag.*, 155, 298–315, <https://doi.org/10.1017/S0016756817000334>, 2018.
- Reinecke, T.: Very-high-pressure metamorphism and uplift of coesite-bearing metasediments from the Zermatt-Saas zone, Western Alps, *Eur. J. Mineral.*, [TS33](https://doi.org/10.1127/ejm/3/1/0007) 7–18, <https://doi.org/10.1127/ejm/3/1/0007>, 1991.
- Reynes, J., Jollands, M., Hermann, J., and Ireland, T.: Experimental constraints on hydrogen diffusion in garnet, *Contrib. Mineral. Petrol.*, 173, 69 [TS34](https://doi.org/10.1007/s00410-018-1492-z), <https://doi.org/10.1007/s00410-018-1492-z>, 2018.
- Reynes, J., Lanari, P., and Hermann, J.: A mapping approach for the investigation of Ti–OH relationships in metamorphic garnet, *Contrib. Mineral. Petrol.*, 175, 46 [TS35](https://doi.org/10.1007/s00410-020-01681-5), <https://doi.org/10.1007/s00410-020-01681-5>, 2020.
- Rossman, G. R. and Aines, R. D.: The hydrous components in garnets: Grossular-hydrogrossular, *Am. Mineral.*, 76, 1153–1164, 1991.
- Rossman, G. R., Beran, A., and Langer, K.: The hydrous component of pyrope from the Dora Maira Massif, Western Alps, *Eur. J. Mineral.*, [TS36](https://doi.org/10.1127/ejm/01/1/0151) 151–154, <https://doi.org/10.1127/ejm/01/1/0151>, 1989.
- Rubatto, D., Gebauer, D., and Fanning, M.: Jurassic formation and Eocene subduction of the Zermatt–Saas–Fee ophiolites: implications for the geodynamic evolution of the Central and Western Alps, *Contrib. Mineral. Petrol.*, 132, 269–287, <https://doi.org/10.1007/s004100050421>, 1998.
- Rüpke, L. H., Morgan, J. P., Hort, M., and Connolly, J. A. D.: Serpentine and the subduction zone water cycle, *Earth Planet. Sc. Lett.*, 223, 17–34, <https://doi.org/10.1016/j.epsl.2004.04.018>, 2004.
- Schmädicke, E. and Gose, J.: Water transport by subduction: Clues from garnet of Erzgebirge UHP eclogite, *Am. Mineral.*, 102, 975–986, <https://doi.org/10.2138/am-2017-5920>, 2017.
- Schmädicke, E. and Gose, J.: Water in garnet of garnetite (metaroddingite) and eclogite from the Erzgebirge and the Lepontine Alps, *J. Metamorph. Geol.*, 38, 905–933, <https://doi.org/10.1111/jmg.12554>, 2020.
- Schmidt, M. W. and Poli, S.: Experimentally based water budgets for dehydrating slabs and consequences for arc magma generation, *Earth Planet. Sc. Lett.*, 163, 361–379, [https://doi.org/10.1016/S0012-821X\(98\)00142-3](https://doi.org/10.1016/S0012-821X(98)00142-3), 1998.
- Schwandt, C. S., Cygan, R. T., and Westrich, H. R.: Mg self-diffusion in pyrope garnet, *Am. Mineral.*, 80, 483–490, <https://doi.org/10.2138/am-1995-5-609>, 1995 [TS37](https://doi.org/10.2138/am-1995-5-609).
- Sheng, Y.-M., Xia, Q.-K., Dallai, L., Yang, X.-Z., and Hao, Y.-T.: H<sub>2</sub>O contents and D/H ratios of nominally anhydrous minerals from ultrahigh-pressure eclogites of the Dabie orogen, eastern China, *Geochim. Cosmochim. Ac.*, 71, 2079–2103, <https://doi.org/10.1016/j.gca.2007.01.018>, 2007.
- Vho, A., Lanari, P., Rubatto, D., and Hermann, J.: Tracing fluid transfers in subduction zones: an integrated thermodynamic and  $\delta^{18}\text{O}$  fractionation modelling approach, *Solid Earth*, 11, 307–328, <https://doi.org/10.5194/se-11-307-2020>, 2020.
- Xia, Q.-K., Sheng, Y.-M., Yang, X.-Z., and Yu, H.-M.: Heterogeneity of water in garnets from UHP eclogites, eastern Dabieshan, China, *Chem. Geol.*, 224, 237–246, <https://doi.org/10.1016/j.chemgeo.2005.08.003>, 2005.

## Remarks from the language copy-editor

- CE1** Is the intended meaning Zermatt and Saas area, hence Zermatt–Saas with an en dash being more appropriate?
- CE2** Please verify the order. It is our house standard to go from smallest to largest unit, e.g., department to faculty to university. Is UNIL-Mouline a branch of the University of Lausanne and hence should come before it?
- CE3** In keeping with the dominant style of the manuscript, no serial (Oxford) commas were inserted, except in the case of complex lists (i.e. those with items including "and" or "or").
- CE4** Should this be “felsic”?
- CE5** Please note that because time durations and ages have competing representations in the literature, according to our standards “ka” (and Ma) is for specific dates (such as a year in the past) and “kyr” (and Myr) is for durations.
- CE6** Please verify that you also mean pyrope-rich.
- CE7** Please note that following the CSE and ACS, our house standard is to denote chemical bonds with en dashes. Please verify throughout, including in the tables.
- CE8** Please verify changes made in the tables that may not appear in the tracked-changes pdf.
- CE9** Are such abbreviations in this table and throughout well known in your field or should they be defined for clarity?
- CE10** Please verify the name.
- CE11** Do you mean Wangye-Unterer?
- CE12** Since they are only used here, can both these sets of abbreviations (LP–HT and HP–LT) be omitted?
- CE13** Please verify that you mean grossular-rich as well.
- CE14** Please verify that you mean andradite–grossular-rich as well.
- CE15** Please verify this sentence. There are two instances of A4544. Do you perhaps mean “Sample A4544 and the core of ZTUv...”?
- CE16** Please verify the use of en dashes joining different band numbers throughout. In this paragraph, for example, one is referred to as a doublet when there are three numbers given, two of which are joined with an en dash.
- CE17** Please verify all the slashes used throughout this paper. A slash can be used to mean “or”, but if you meant “and” or “and/or” in some or all instances, the slash should be replaced. Please check all cases and indicate whether any instances should be changed.
- CE18** Please verify that you mean eclogites-rich.
- CE19** Please define unless the term is widely understood in your field.

## Remarks from the typesetter

- TS1** The composition of all figures has been adjusted to our standards.
- TS2** Please note that units have been changed to exponential format throughout the text. Please check all instances.
- TS3** Please confirm.
- TS4** Please confirm.
- TS5** Please confirm.
- TS6** Please confirm.
- TS7** Please confirm change.
- TS8** Please provide date of last access (day month year).
- TS9** Please define italic font in this table or can it be deleted?
- TS10** Please confirm dot sign for decimal font.
- TS11** Please confirm mathematical change.
- TS12** Please send a new Supplement as a \*.pdf without the title, authors, correspondence author, etc. as we will generate a Supplement title page during publication (with a citation including the DOI), which will contain this information.
- TS13** Please confirm.
- TS14** Please provide full first name.
- TS15** Please provide full first name.
- TS16** Please note that the funding information has been added to this paper. Please check if it is correct. Please also double-check your acknowledgements to see whether repeated information can be removed or changed accordingly. Thanks.
- TS17** Please ensure that any data sets and software codes used in this work are properly cited in the text and included in this reference list. Thereby, please keep our reference style in mind, including creators, titles, publisher/repository, persistent identifier, and publication year. Regarding the publisher/repository, please add “[data set]” or “[code]” to the entry (e.g. Zenodo [code]).

- TS18 Please provide volume.
- TS19 Please provide publisher and DOI or ISBN.
- TS20 Please provide pages or article number.
- TS21 Please check title.
- TS22 Please provide publisher and DOI or ISBN.
- TS23 Please check title.
- TS24 Please provide publisher and DOI or ISBN.
- TS25 Please provide pages or article number.
- TS26 Please provide pages or article number.
- TS27 Please provide publisher and DOI or ISBN.
- TS28 Please check title.
- TS29 Please provide full last name.
- TS30 Please provide publisher and DOI or ISBN.
- TS31 Please provide publisher and DOI or ISBN.
- TS32 Please provide pages or article number with DOI.
- TS33 Please provide volume.
- TS34 Please provide pages or article number.
- TS35 Please provide pages or article number.
- TS36 Please provide volume.
- TS37 Reference is missing in text.
