# Supplementary material for: OH incorporation and retention in eclogite-facies garnets from the Zermatt–Saas area (Switzerland) and their contribution to the deep water cycle
Source: Copernicus journal article supplement (doi:10.5194/ejm-35-679-2023), 2023-08-24
Supplement: Supplementary file 1 [file ejm-35-679-2023-supplement.zip › SupplementaryMaterial.pdf]

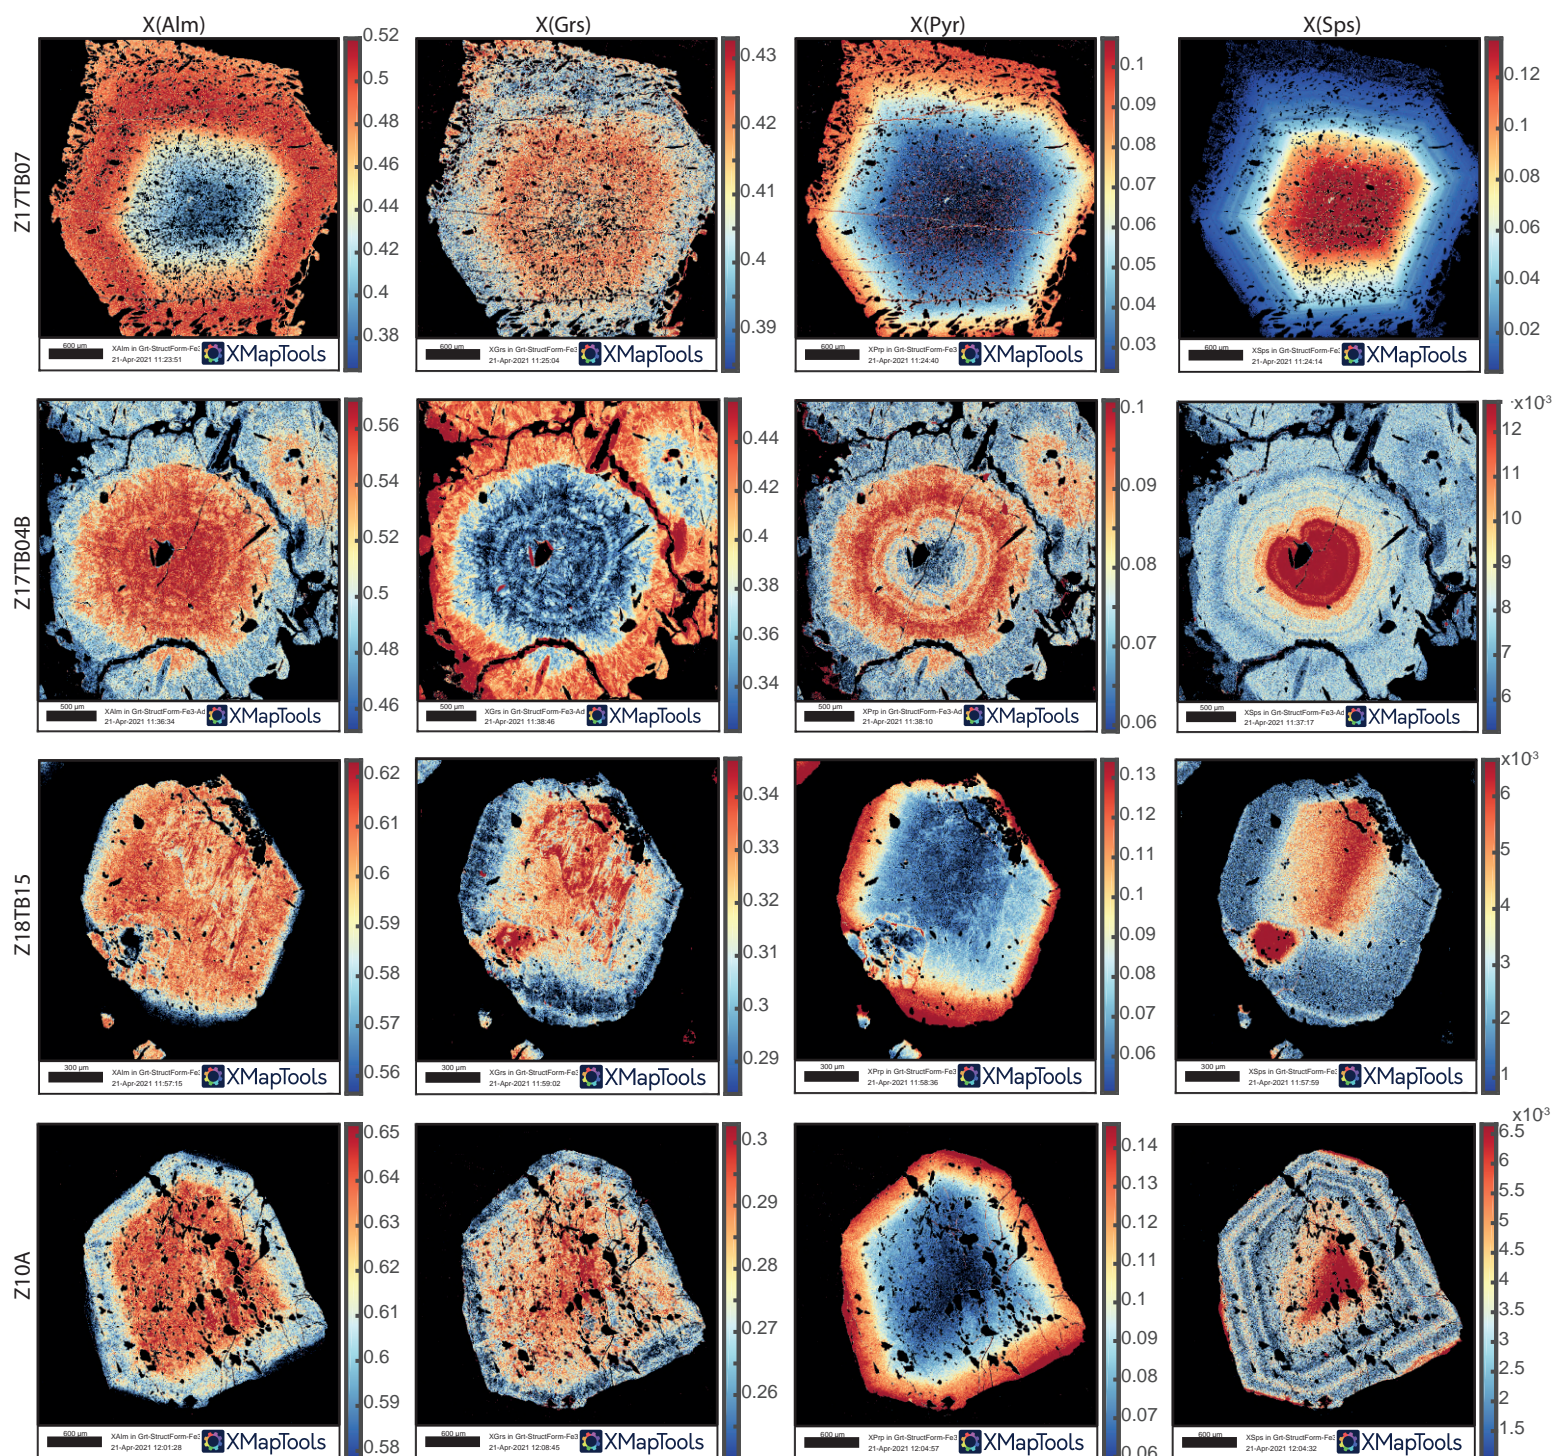

Figure S1 : Endmember maps obtained from X-ray mapping with EPMA.

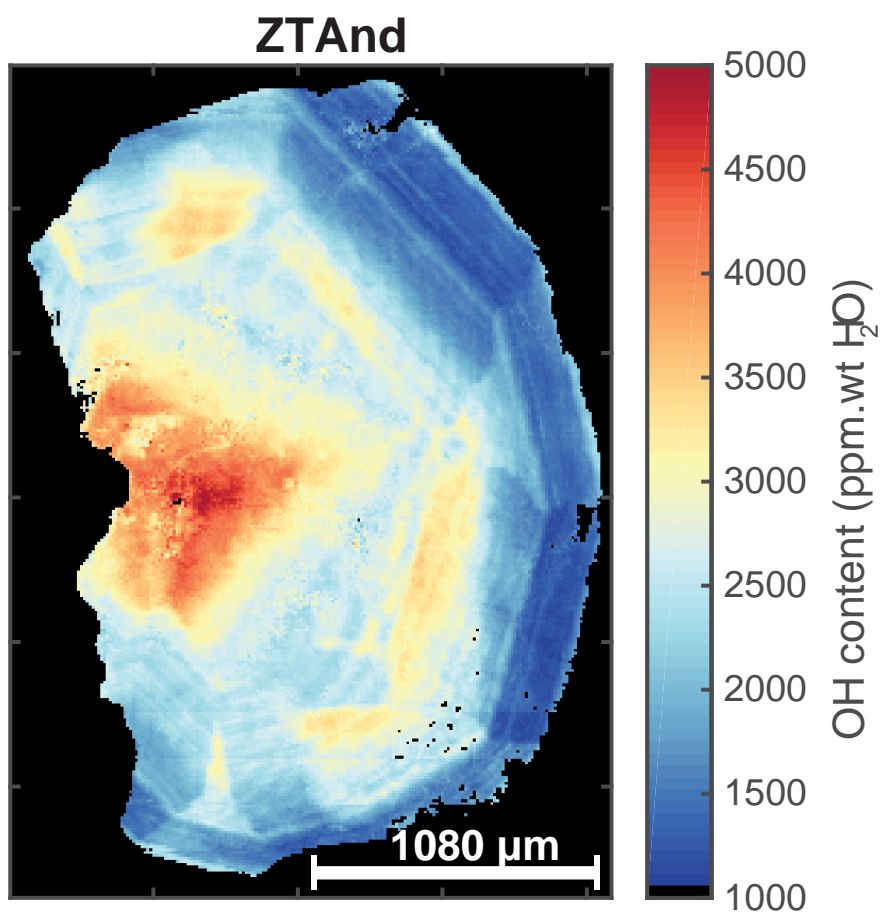

Figure S2 : OH map acquired on a grain of sample ZTAnd. Map was acquired with an FPA mapping detector and a binning of 2 (pixel size= 5.4 μm).

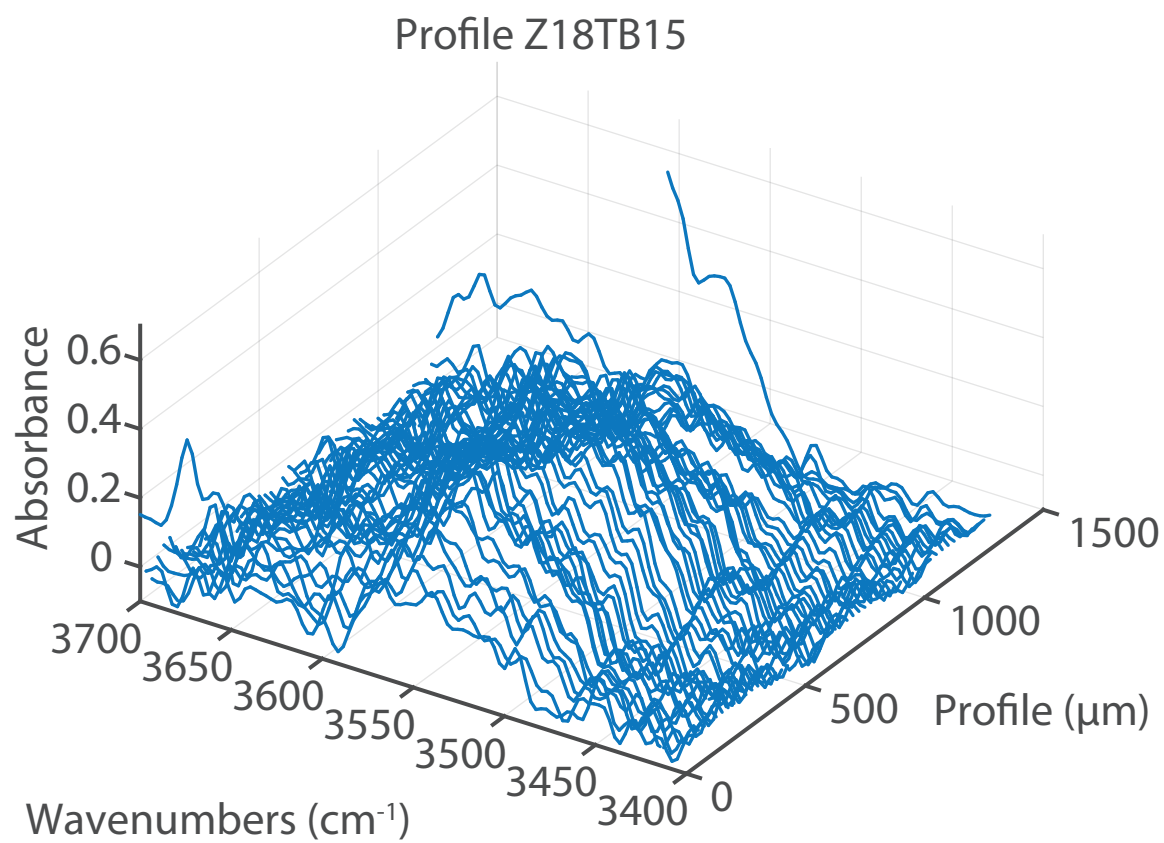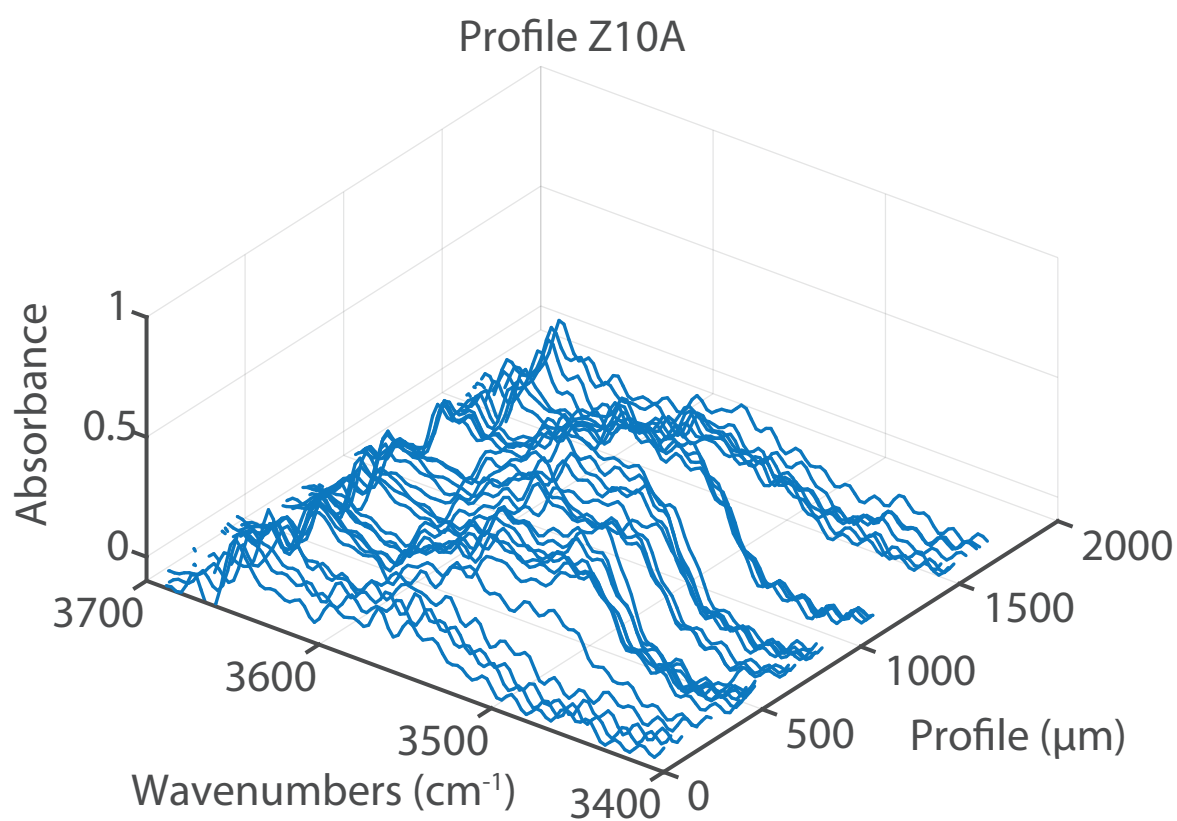

Figure S3a : Stacked OH region spectra along the adjusted profile measured and displayed on figure 7. Samples Z18TB15 and Z10A.

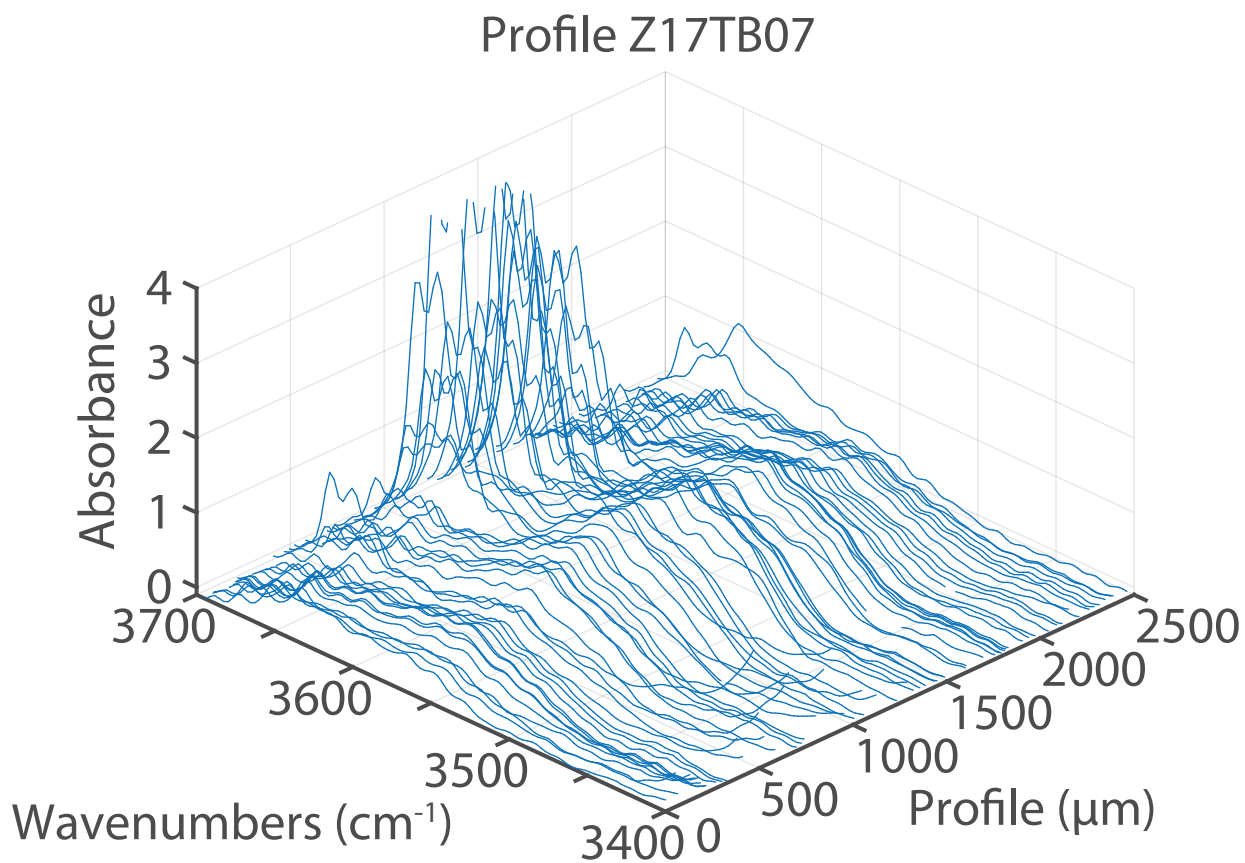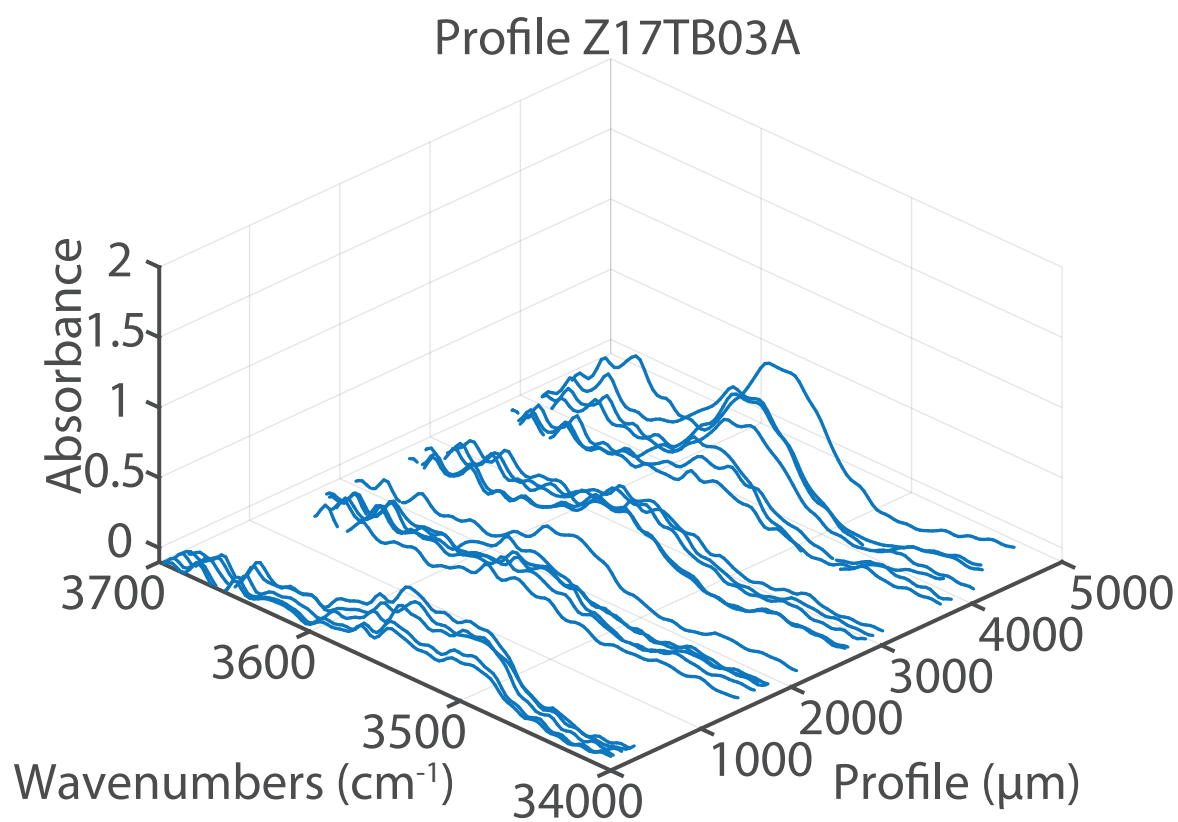

Figure S3b : Stacked OH region spectra along the adjusted profile measured and displayed on figure 7. Samples Z17TB07 and Z17TB03A.
